# Supplementary material for: Preferential solvation of meso-methyl BODIPYs with pyridine via pseudo-hydrogen-bonds
Source: Royal Society of Chemistry journal article supplement (doi:10.1039/d1cp05281k), 2022-01-01
Supplement: d1cp05281k1.pdf [file d1cp05281k1.pdf]

Supplementary Information for

## Preferential solvation of *meso*-methyl BODIPYs with pyridine via *pseudo*-hydrogen bonds

Mitsuhiko Morisue,\* Miho Kawanishi, and Takahiro Kusakawa

Faculty of Molecular Chemistry and Engineering, Kyoto Institute of Technology, Matsugasaki, Sakyo-ku, Kyoto 606-8585

phone&fax: +81-75-724-7806, e-mail: morisue@kit.ac.jp

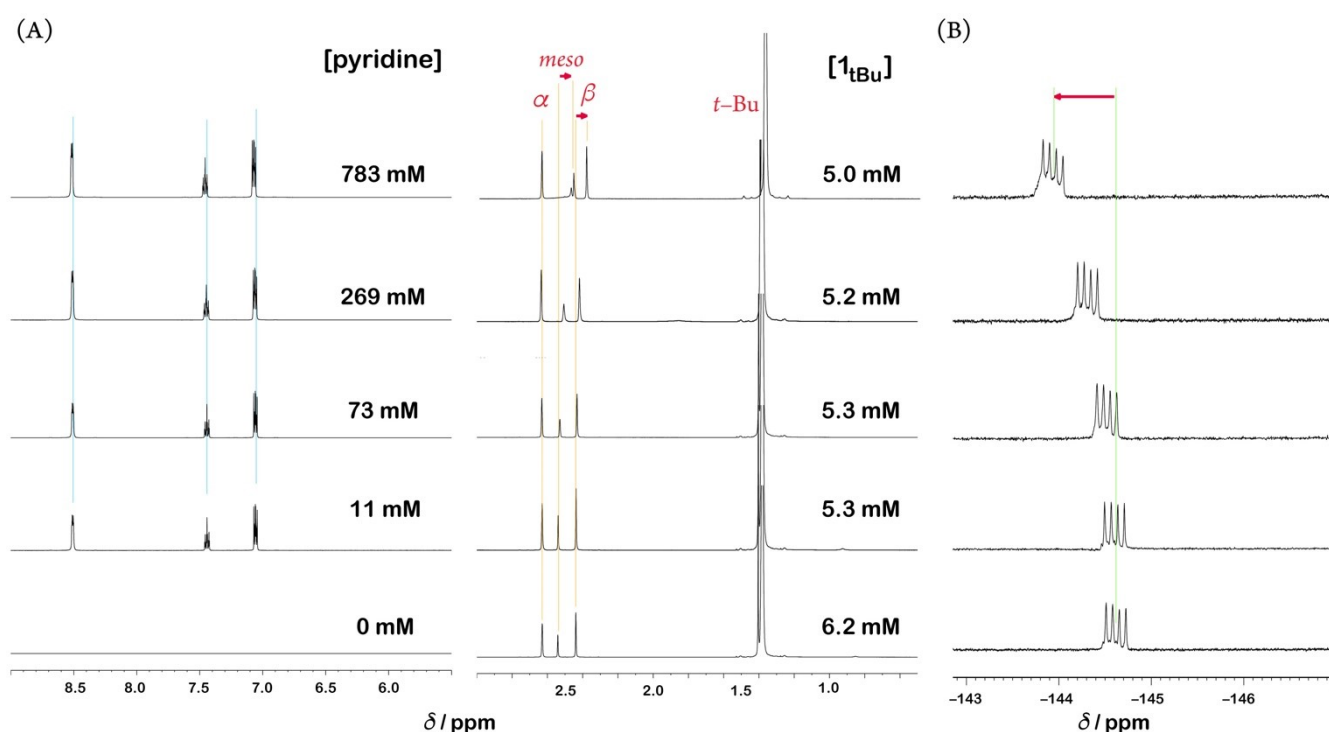

**Fig S1.**  $^1H$  (500 MHz, A) and  $^{19}F$  NMR spectra (470 MHz, B) of  $1_{tBu}$  (from  $6.2 \times 10^{-3}$  M diluted to  $5.0 \times 10^{-3}$  M, bottom to top) in the presence of added pyridine (up to  $7.83 \times 10^{-1}$  M, bottom to top) at 298 K in cyclohexane- $d_{12}$ . The peak height in the aromatic region was normalised to that in the aliphatic region. In the absence of pyridine, the *meso*-proton is deshielded by the self-complementary C–H $\cdots$ F nonconventional hydrogen bond formation in a dimer (Fig 7). The addition of excess amount of pyridine relieved the downfield shift, instead the more acidic pyridyl proton lead to downfield shift of the fluorine.

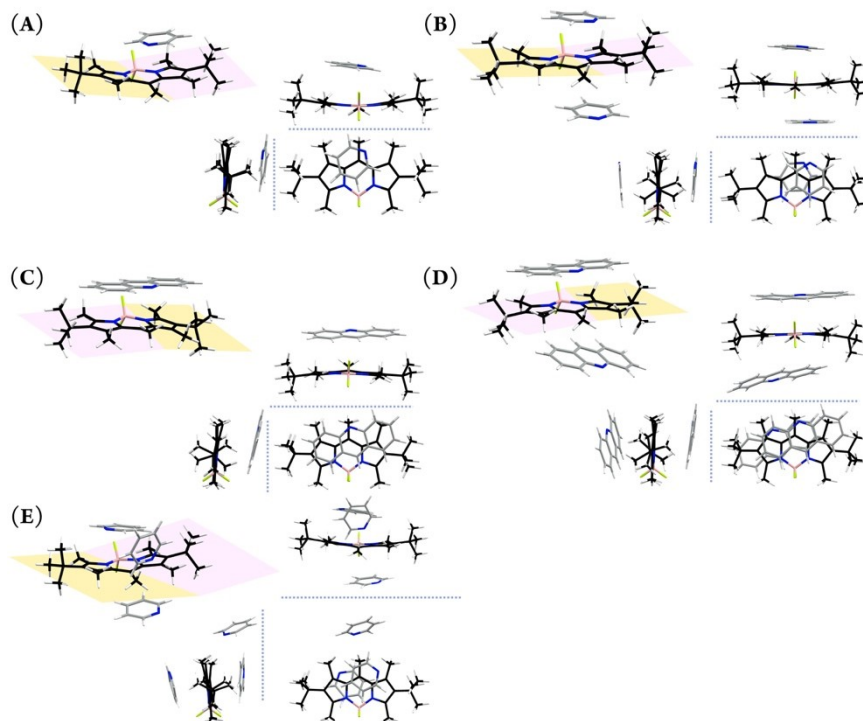

**Fig S2.** Geometry-optimised structures of  $1_{t\text{Bu}}\cdot\text{pyridine}$  (A),  $1_{t\text{Bu}}\cdot(\text{pyridine})_2$  (B),  $1_{t\text{Bu}}\cdot\text{acridine}$  (C),  $1_{t\text{Bu}}\cdot(\text{acridine})_2$  (D), and  $1_{t\text{Bu}}\cdot(\text{pyridine})_3$  (E) generated by the dispersion-corrected DFT calculations at the B3LYP-D3(BJ)/6-31G(d,p) level of theory.

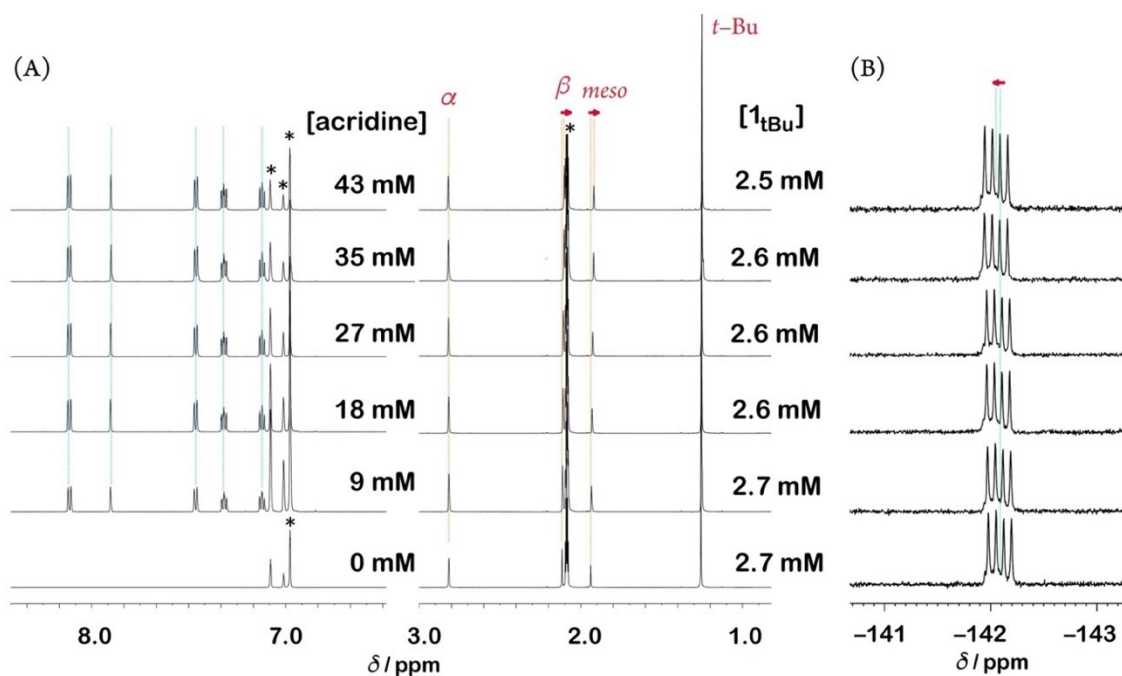

**Fig S3.**  $^1\text{H}$  (500 MHz, A) and  $^{19}\text{F}$  NMR spectra (470 MHz, B) of  $1_{t\text{Bu}}$  (from  $2.7 \times 10^{-3}$  diluted up to  $2.6 \times 10^{-3}$  M, bottom to top) in the presence of added acridine (up to  $4.3 \times 10^{-2}$  M, bottom to top) at 298 K in toluene- $d_8$ . The peak height in the aromatic region was normalised to that in the aliphatic region. An asterisk indicates a peak ascribed to residual solvent. A small upfield shift of  $\beta$ - and *meso*-methyl protons suggested shielding by the acridine plane. The proton of 9-acridine showed a downfield shift in the presence of  $1_{t\text{Bu}}$ , suggesting C-H $\cdots$ N *pseudo*-hydrogen-bond formation, as supported by the downfield shift of fluorine.

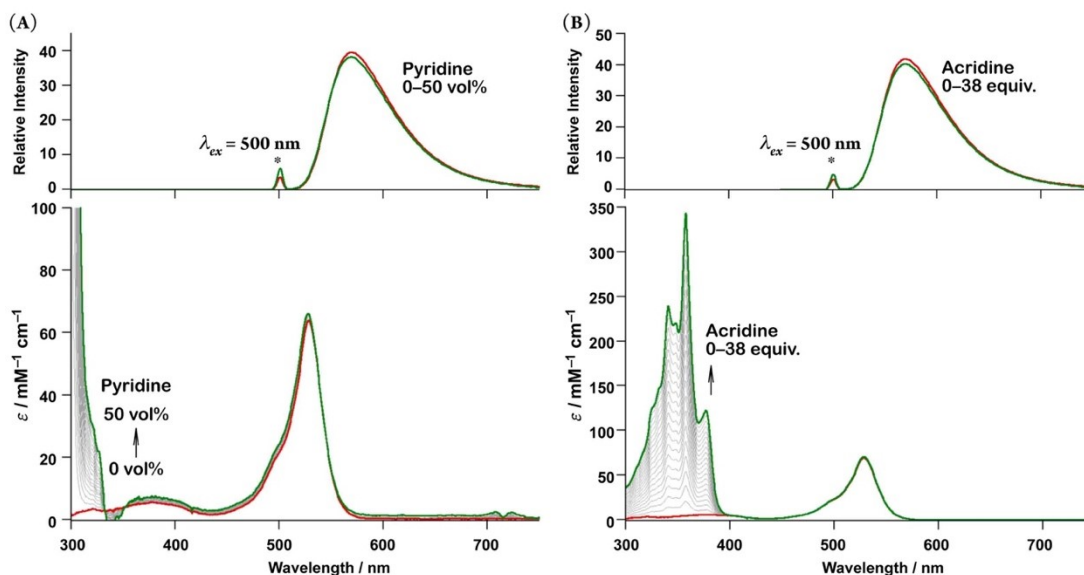

**Fig S4.** Spectrometric titration of  $\mathbf{1}_{tBu}$  ( $[\mathbf{1}_{tBu}]_0 = 1.4 \times 10^{-6}$  M, red line, diluted up to  $6.9 \times 10^{-7}$  M, green line via grey lines) with pyridine (up to 50 vol%, green line) (A, shown as constant  $[\mathbf{1}_{tBu}]$ ) and  $\mathbf{1}_{tBu}$  ( $[\mathbf{1}_{tBu}]_0 = 1.37 \times 10^{-6}$  M, red line, diluted up to  $9.1 \times 10^{-5}$  M, green line via grey lines) with acridine (up to  $3.5 \times 10^{-5}$  M, green line) (B, shown as constant  $[\mathbf{1}_{tBu}]$ ) at 298 K in toluene. Fluorescence spectra were obtained by the excitation at 480 and 500 nm for pyridine and acridine titration, respectively. Absorption spectra are shown as constant  $[\mathbf{1}_{tBu}]$  in (A) and (B), and fluorescence spectra are normalised by the absorbance at the excitation wavelength (480 nm in (A) and 500 nm in (B)).

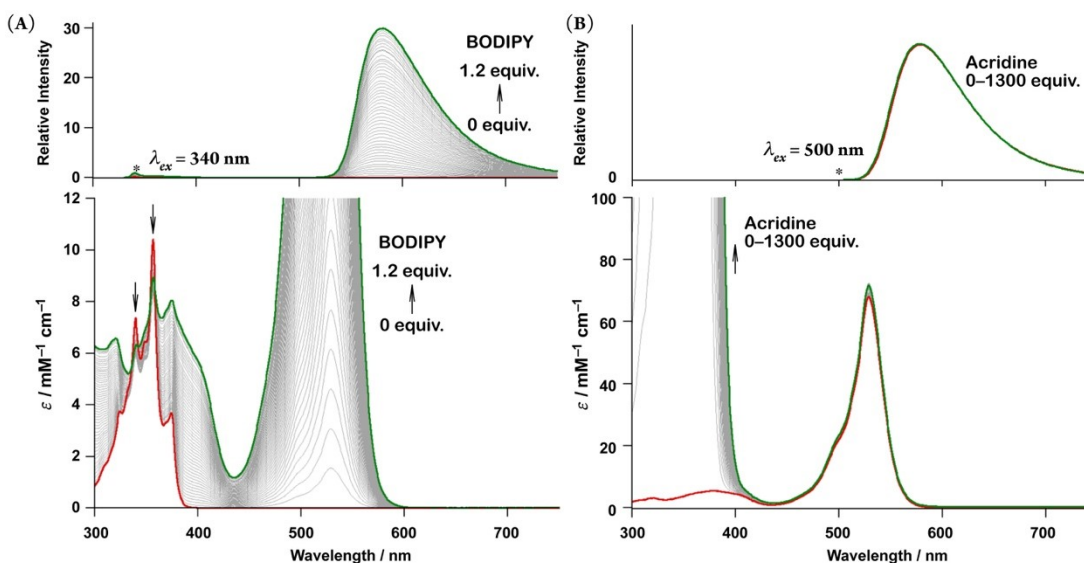

**Fig S5.** Spectrometric titration of acridine ( $[\text{acridine}]_0 = 5.2 \times 10^{-5}$  M, red line, diluted up to  $2.3 \times 10^{-5}$  M, green line via grey lines) with  $\mathbf{1}_{tBu}$  (up to  $2.6 \times 10^{-5}$  M, green line) (A) and  $\mathbf{1}_{tBu}$  ( $[\mathbf{1}_{tBu}]_0 = 3.8 \times 10^{-6}$  M, red line, diluted up to  $2.0 \times 10^{-6}$  M, green line via grey lines) with acridine (up to  $2.6 \times 10^{-3}$  M, green line) (B) at 298 K in cyclohexane. Fluorescence spectra (upper panels) were obtained by the excitation of acridine at 340 and  $\mathbf{1}_{tBu}$  at 500 nm in (A) and (B). Absorption spectra are shown as constant  $[\text{acridine}]$  in (A) and constant  $[\mathbf{1}_{tBu}]$  in (B). Fluorescence spectra are normalised by the absorbance at the excitation wavelength (340 nm in (A) and 500 nm in (B)). The spectral shape in (A) becomes distorted as increasing the inner filter effect of the intense absorption band of  $\mathbf{1}_{tBu}$  at higher concentration.

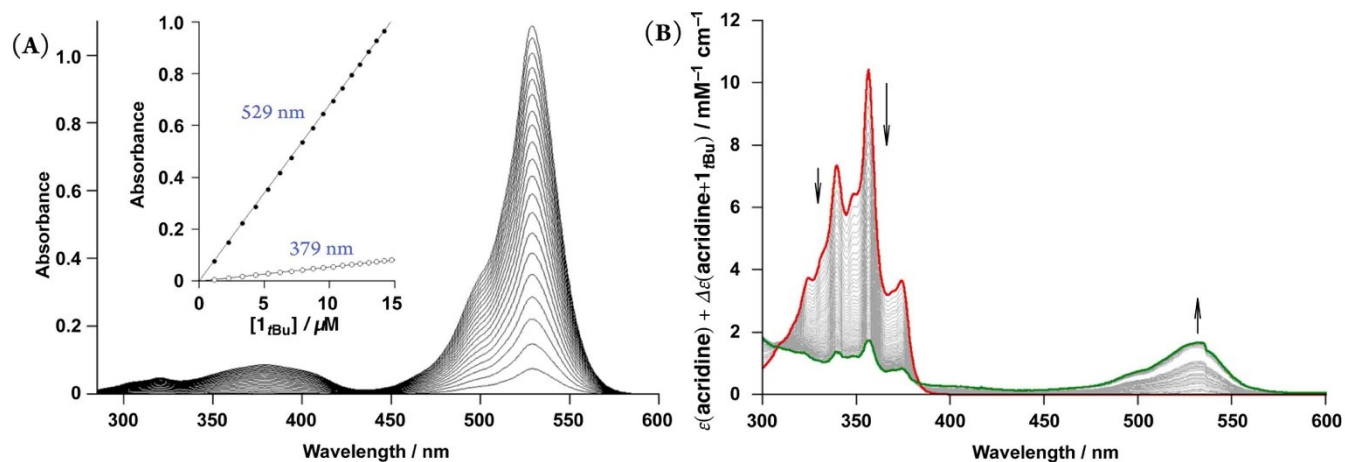

**Fig S6.** Absorption spectra of  $\mathbf{1}_{t\text{Bu}}$  at various concentration at 298 K in cyclohexane and the Beer's plot ( $\epsilon_{529} = 68.0$  and  $\epsilon_{379} = 5.5 \text{ mM}^{-1} \text{ cm}^{-1}$ ) (A). Mathematical subtraction of  $\mathbf{1}_{t\text{Bu}}$  from the observed spectral change in Fig S6A, and therefore the spectra are shown as constant [acridine] together with change of absorption of  $\mathbf{1}_{t\text{Bu}}$  and acridine (B). The spectral change was plotted as the titration isotherms in Fig 6B. We carefully confirmed the reproducibility of the titration experiment to minimise the experimental and mathematical error arising from the small molar absorptivity of acridine, which is approximately quarter of that of  $\mathbf{1}_{t\text{Bu}}$ .

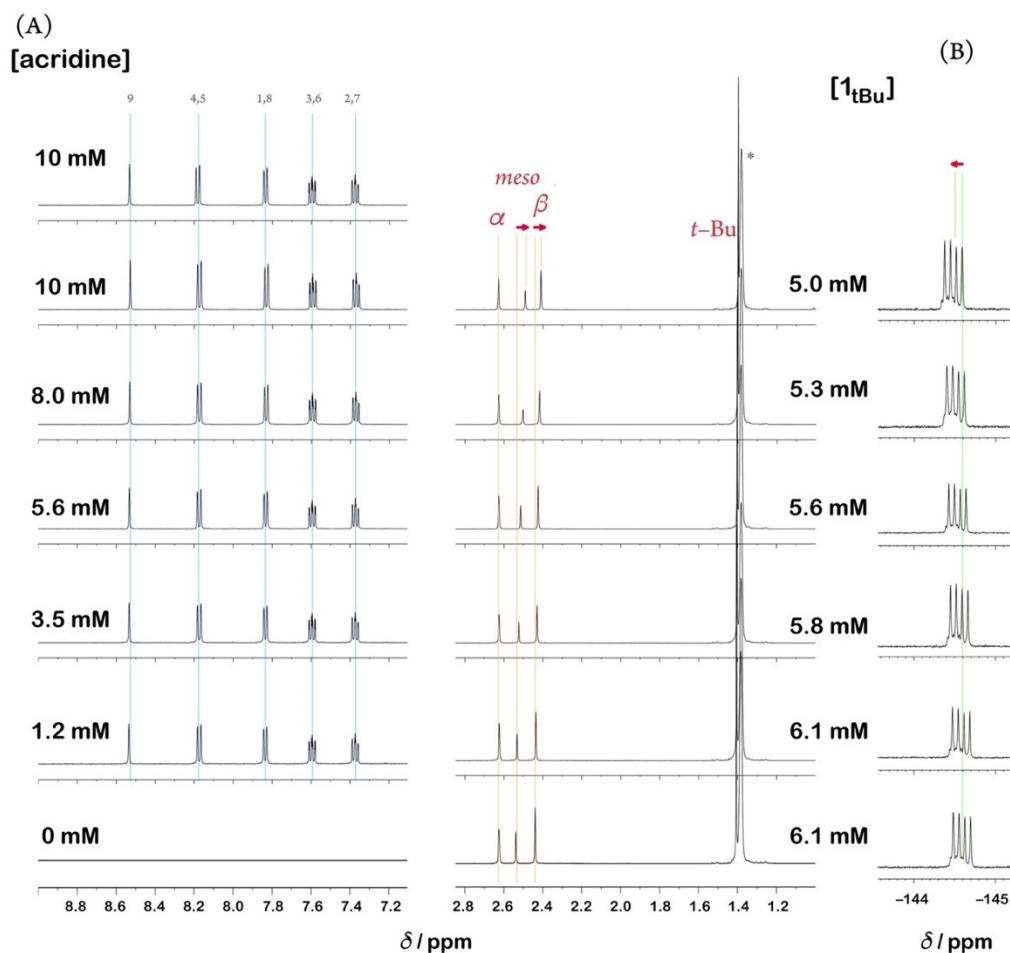

**Fig S7.**  $^1\text{H}$  (500 MHz, A) and  $^{19}\text{F}$  NMR spectra (470 MHz, B) of  $\mathbf{1}_{t\text{Bu}}$  (from  $6.1 \times 10^{-3}$  diluted up to  $5.0 \times 10^{-3}$  M, bottom to top) in the presence of added acridine (up to  $10.0 \times 10^{-2}$  M, bottom to top) at 298 K in cyclohexane- $d_{12}$ . The peak height in the aromatic region was normalised to that in the aliphatic region. An asterisk indicates a peak ascribed to residual solvent. A small selective upfield shift of  $\beta$ - and *meso*-methyl protons suggested a shielding by the acridine plane.

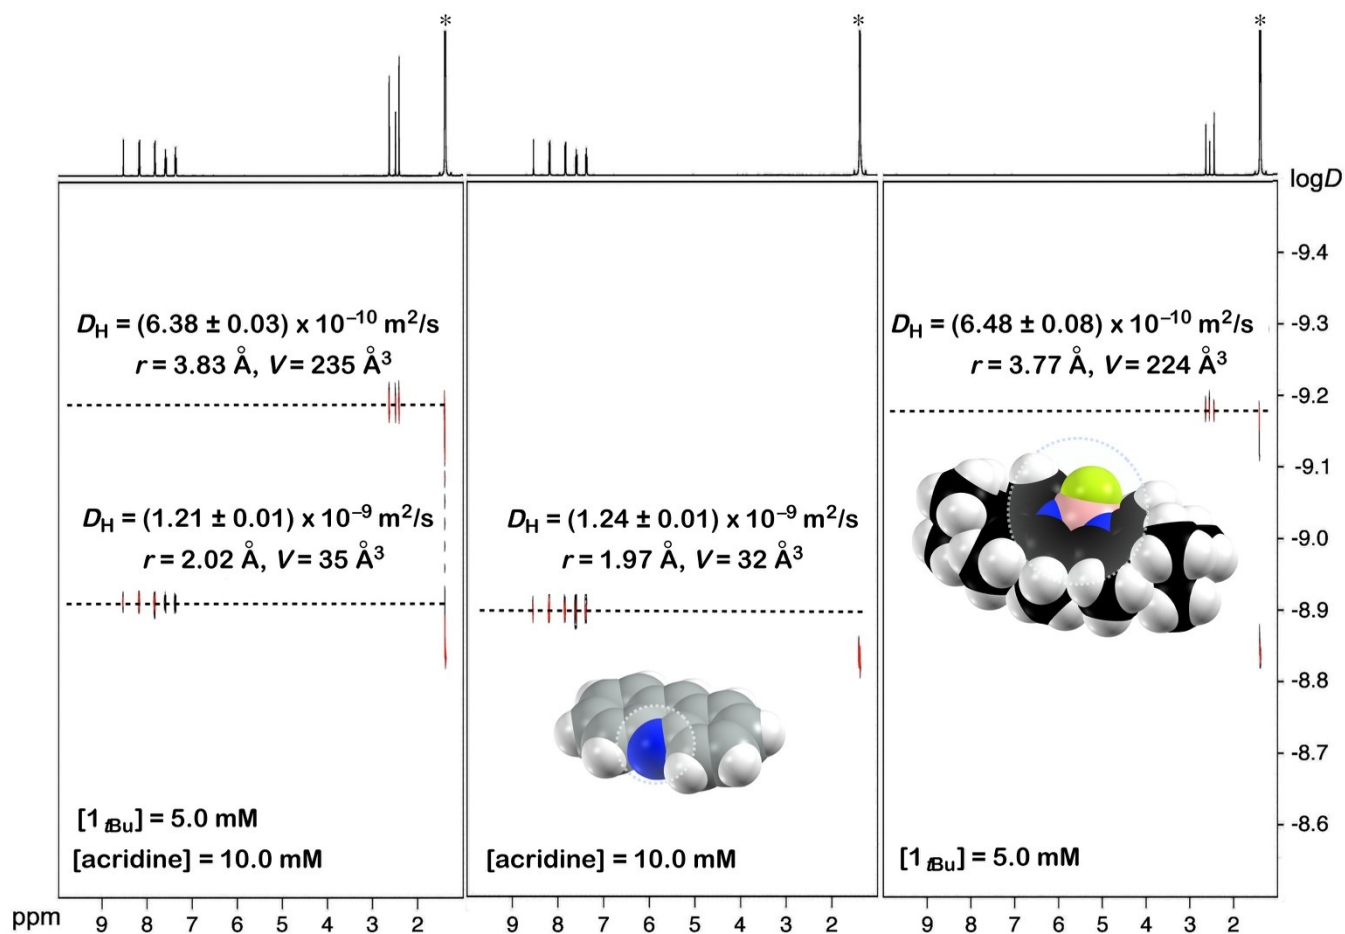

**Fig S8.**  $^1\text{H}$  DOSY spectra (500 MHz) of a mixture of  $\mathbf{1}_{\text{tBu}}$  (5.0 mM) and acridine (10.0 mM) (left), acridine (5.0 mM) (middle), and  $\mathbf{1}_{\text{tBu}}$  (5.0 mM) (right) in cyclohexane- $d_{12}$ . The geometry optimized structures of acridine and  $\mathbf{1}_{\text{tBu}}$  (B3LYP-D3(BJ)/6-31G(d,p)) with circles with radius ( $r$ ) = 1.97 and 3.77 Å, respectively, are shown. The diffusion coefficients ( $D_{\text{H}}$ ) became smaller than the corresponding components by mixing, suggesting interaction  $\mathbf{1}_{\text{tBu}}$  with acridine. Although  $\mathbf{1}_{\text{tBu}}$  is assumed to involve self-aggregated species, the diffusion coefficient of  $\mathbf{1}_{\text{tBu}}$  is larger than that of mixture of  $\mathbf{1}_{\text{tBu}}$  and acridine, in line with the fact that the binding constant for the  $\mathbf{1}_{\text{tBu}} \cdots$  acridine interaction is greater than the self-aggregation of  $\mathbf{1}_{\text{tBu}}$  (Fig 5).

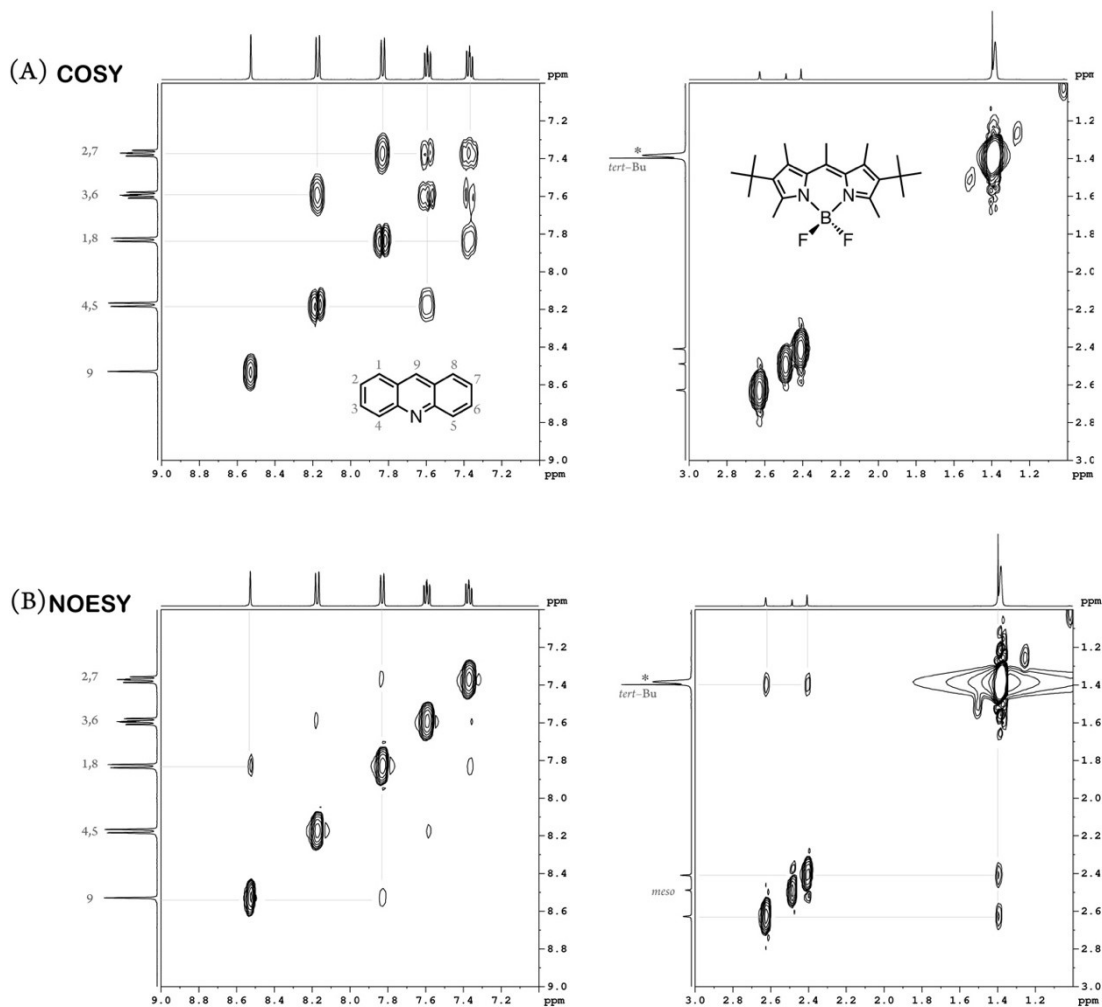

**Fig S9.**  $^1\text{H}$ - $^1\text{H}$  COSY (A) and NOESY (B) spectra (500 MHz) of a mixture of **1<sub>tBu</sub>** (5.0 mM) and acridine (10.0 mM) in cyclohexane- $d_{12}$ . Aromatic (left) and aliphatic region (right) are shown separately. No intermolecular correlations between aromatic and aliphatic signals were found in COSY and NOESY spectra.

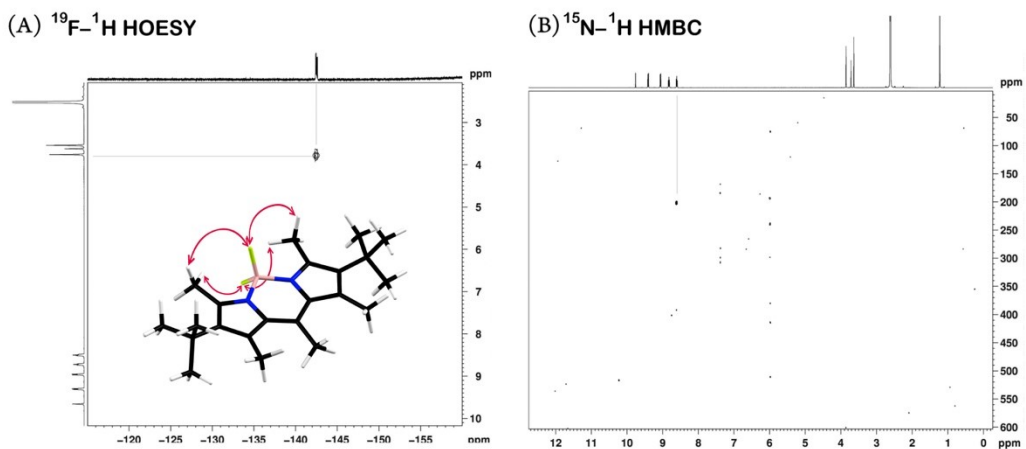

**Fig S10.**  $^{19}\text{F}$ - $^1\text{H}$  HOESY (A) and  $^{15}\text{N}$ - $^1\text{H}$  HMBC (B) spectra of the mixture of **1<sub>tBu</sub>** (5.0 mM) and acridine (10.0 mM) in cyclohexane- $d_{12}$ . Only intramolecular correlations were found.

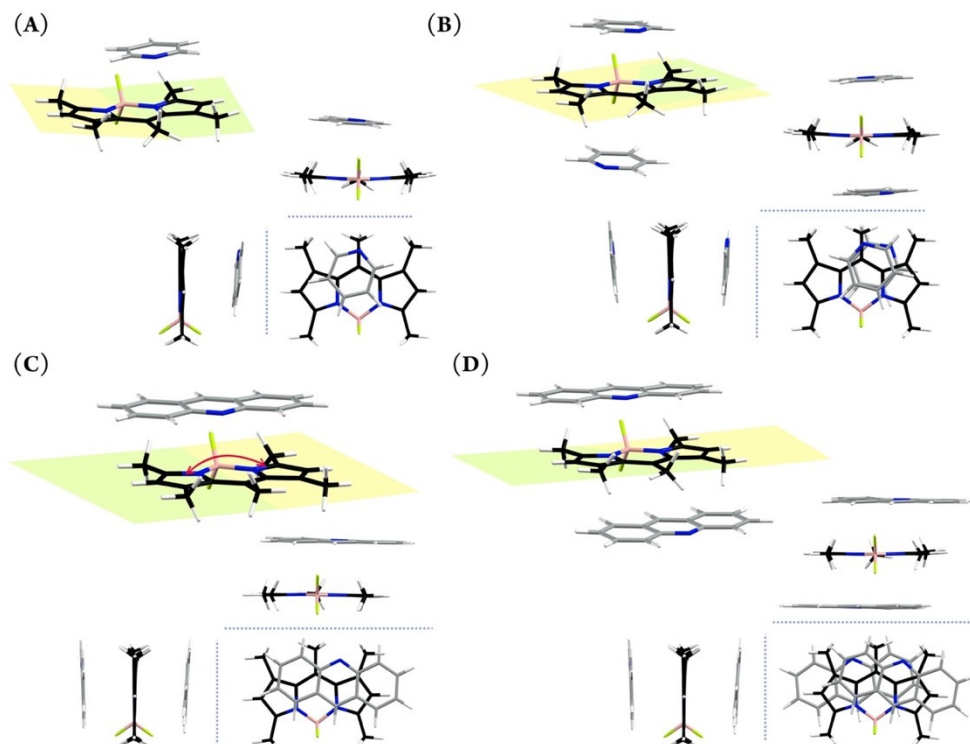

**Fig S11.** Geometry-optimised structures of  $\mathbf{1_H}\cdot$ pyridine (A),  $\mathbf{1_H}\cdot$ (pyridine)<sub>2</sub> (B),  $\mathbf{1_H}\cdot$ acridine (C) and  $\mathbf{1_H}\cdot$ (acridine)<sub>2</sub> (D) generated by the dispersion-corrected DFT calculations at the B3LYP-D3(BJ)/6-31G(d,p) level of theory.

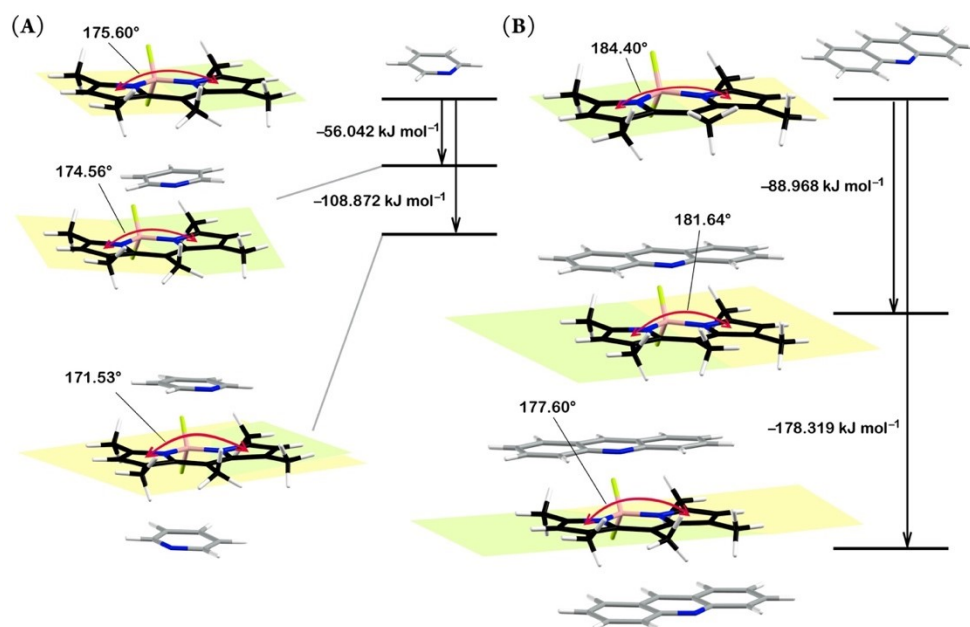

**Fig S12.** Geometry-optimised structures of  $\mathbf{1_H}$ ,  $\mathbf{1_H}\cdot$ pyridine, and  $\mathbf{1_H}\cdot$ (pyridine)<sub>2</sub> (upper to lower in A), and  $\mathbf{1_H}$ ,  $\mathbf{1_H}\cdot$ acridine, and  $\mathbf{1_H}\cdot$ (acridine)<sub>2</sub> (upper to lower in B) produced using DFT calculations at the B3LYP-D3(BJ)/6-31G(d,p) level, where dihedral angle between two pyrrole rings of  $\mathbf{1_H}$  (yellow and pink planes), and close C-H $\cdots$ N, C-H $\cdots$  $\pi$  and C-H $\cdots$ F separations are indicated. Vertical axes show relative stabilisation from the dissociation limit of two or three isolated components assuming toluene based on IEF-PCM DFT/B3LYP-D3(BJ) calculations at 6-31G(d,p) level.

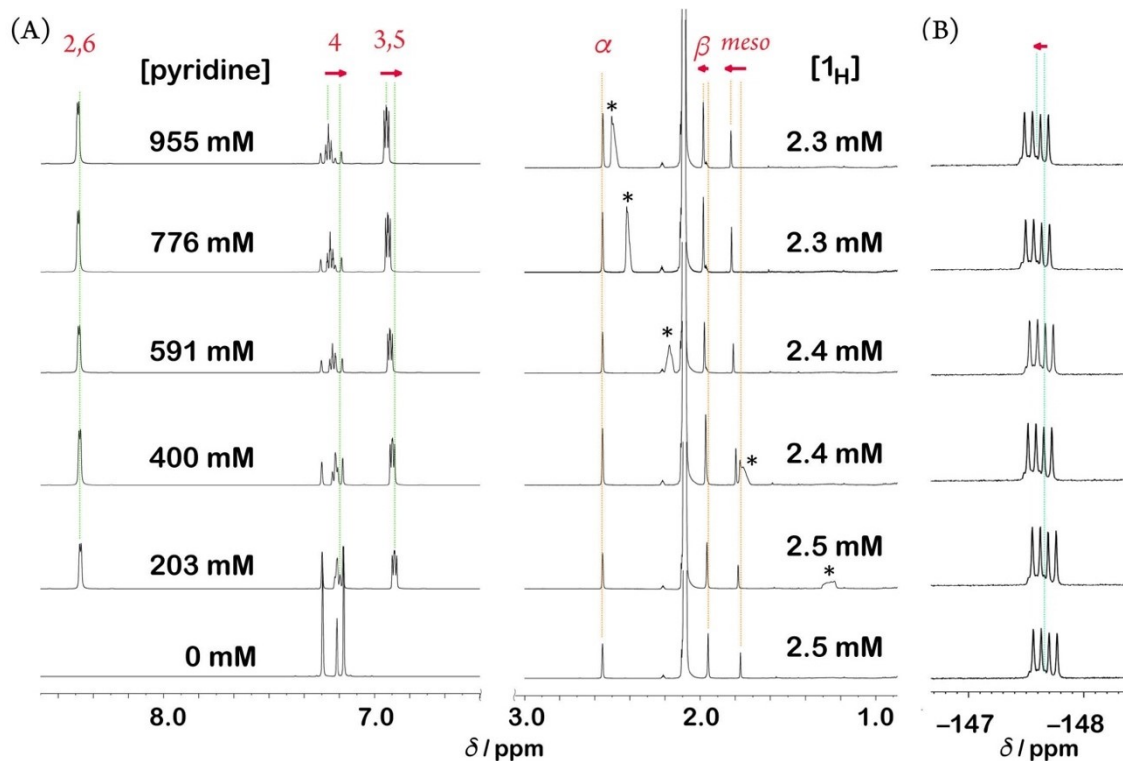

**Fig S13.**  $^1\text{H}$  (500 MHz, A) and  $^{19}\text{F}$  NMR spectra (470 MHz, B) of  $1_{\text{H}}$  (from  $2.5 \times 10^{-3}$  diluted up to  $2.3 \times 10^{-3}$  M) in the presence of added pyridine (up to  $9.6 \times 10^{-1}$  M, bottom to top) at 298 K in toluene- $d_8$ . The peak height in the aromatic region was normalised to that in the aliphatic region. An asterisk indicates a peak ascribed to residual water.

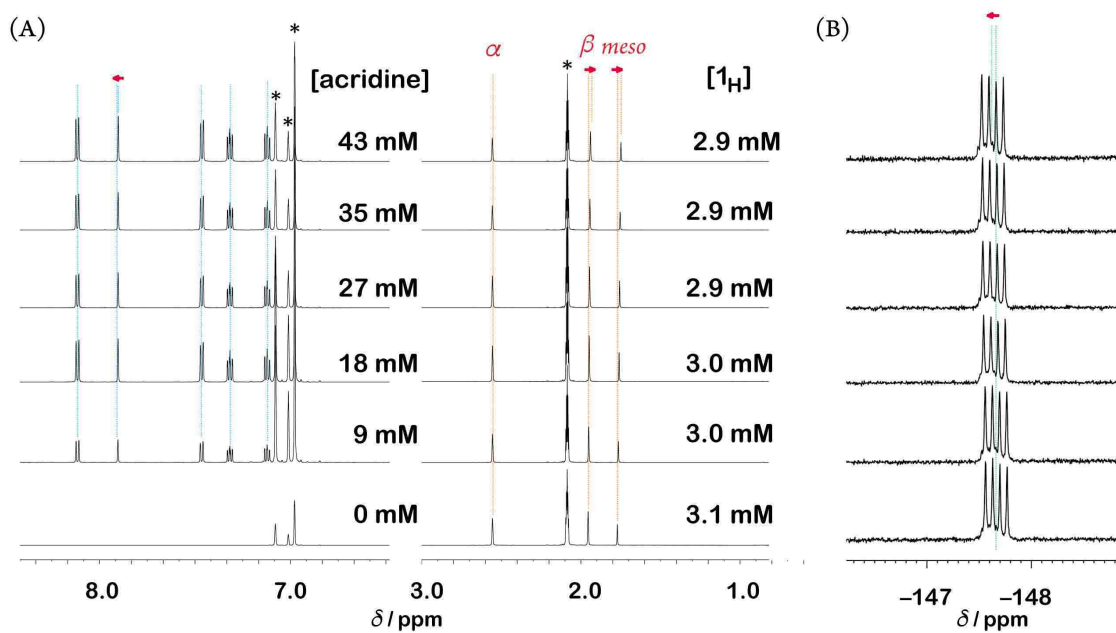

**Fig S14.**  $^1\text{H}$  (500 MHz, A) and  $^{19}\text{F}$  NMR spectra (470 MHz, B) of  $1_{\text{H}}$  (from  $3.1 \times 10^{-3}$  diluted up to  $2.9 \times 10^{-3}$  M, bottom to top) in the presence of acridine (up to  $4.3 \times 10^{-2}$  M, bottom to top) at 298 K in toluene- $d_8$ . The peak height in the aromatic region are normalised to that in the aliphatic region. An asterisk indicates a peak ascribed to residual solvent.



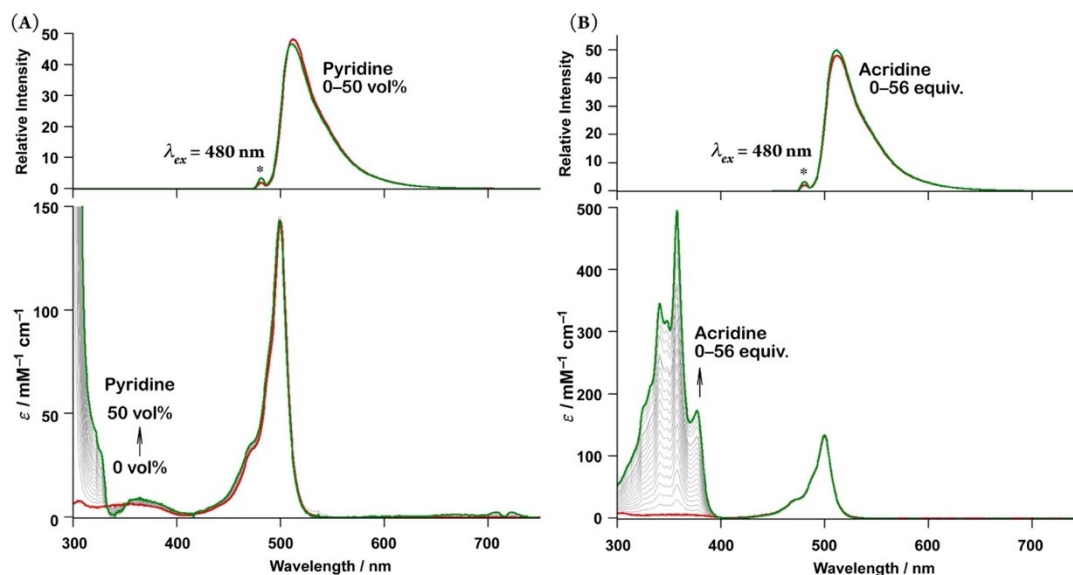

**Fig S15.** Spectrometric titration of  $\mathbf{1_H}$  ( $[\mathbf{1_H}]_0 = 9.5 \times 10^{-7}$  M, red line, diluted up to  $4.3 \times 10^{-7}$  M, green line via grey lines) with pyridine (up to 50 vol%, green line) (A) and  $\mathbf{1_H}$  ( $[\mathbf{1_H}]_0 = 9.5 \times 10^{-7}$  M, red line, diluted up to  $6.3 \times 10^{-7}$  M, green line via grey lines) with acridine (up to  $3.5 \times 10^{-5}$  M, green line) (B) at 298 K in toluene. Fluorescence spectra were obtained by the excitation at 480 and 500 nm for pyridine and acridine titration, respectively. Absorption spectra are shown as constant  $[\mathbf{1_H}]$  in (A) and (B), and fluorescence spectra are normalised by the absorbance at the excitation wavelength (480 nm in (A) and 500 nm in (B)).

(A) in neat pyridine- $d_5$

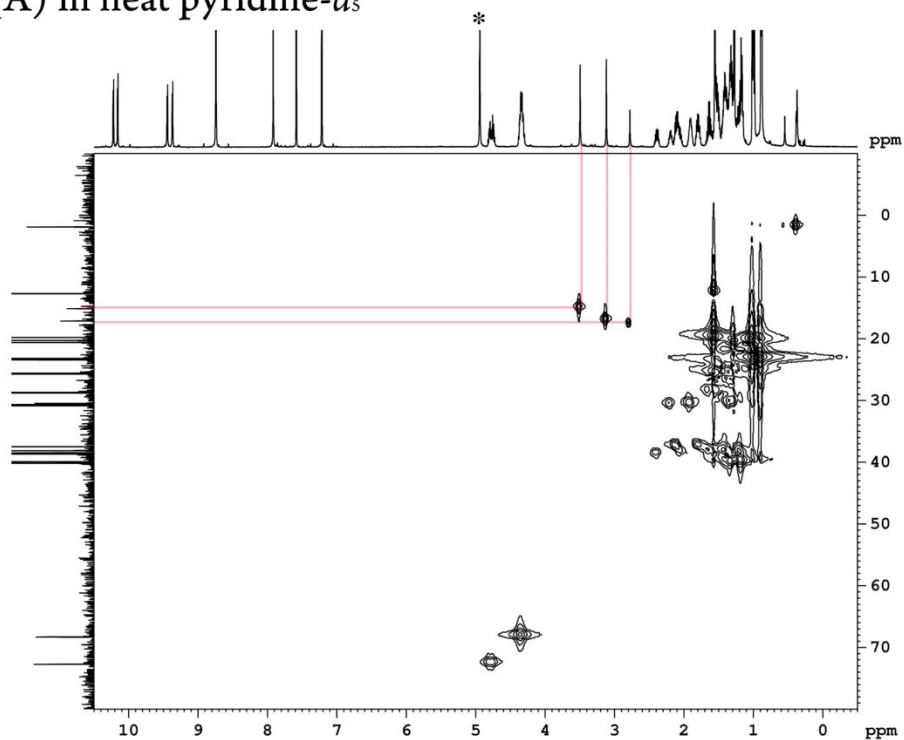

(B) in benzene- $d_6$  including 10% pyridine- $d_5$

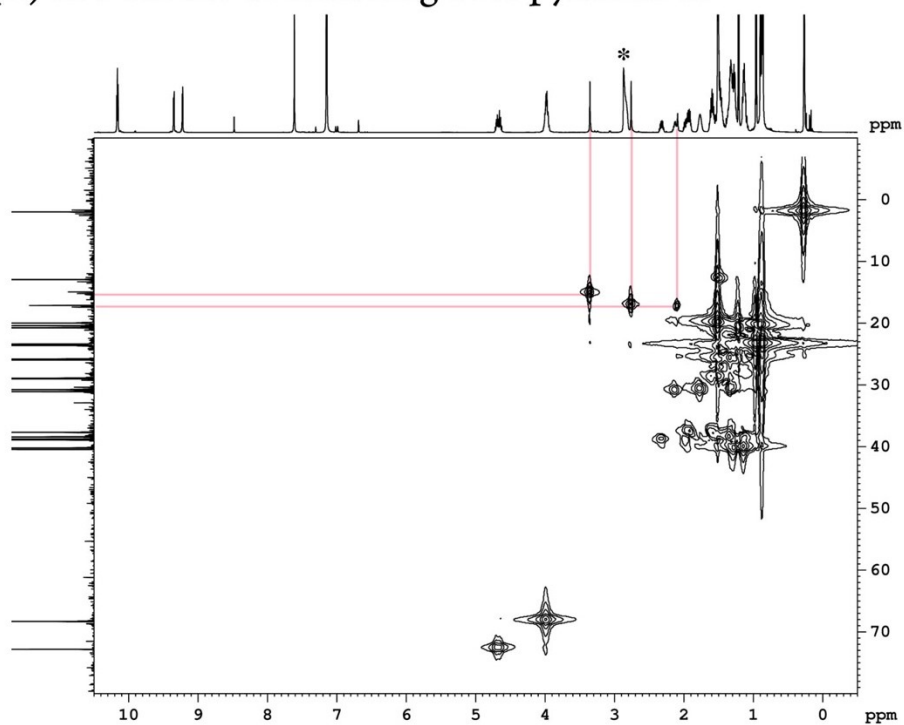

**Fig S16.**  $^{13}\text{C}$ - $^1\text{H}$  HMBC spectra of  $\mathbf{1}_{\text{por}}$  in pyridine- $d_5$  (A) and in benzene- $d_6$  including 10% pyridine- $d_5$  (B).

**Table S1.** Summary of topological descriptors at the bond critical points of  $\mathbf{1}_{t\text{Bu}}^+(\text{pyridine})_2$  and  $\mathbf{1}_{i\text{Bu}}^+(\text{pyridine})_2$  complexes based on the QTAIM analyses of the optimised geometries at the B3LYP-D3(BJ)/6-31G(d,p) level of theory.

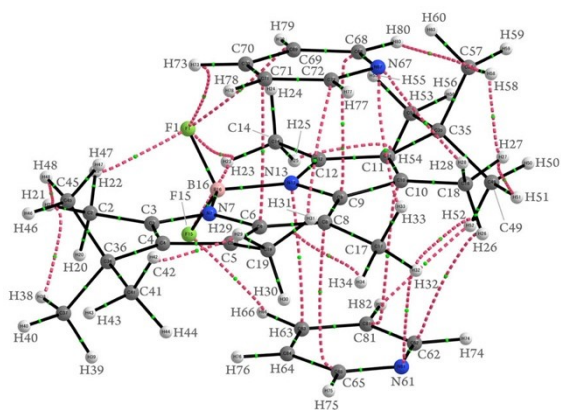

$1_{t\text{Bu}}(\text{pyridine})_2$  complex

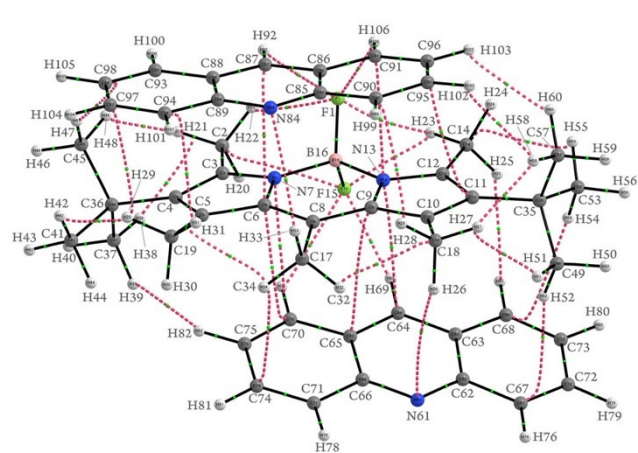

$1_{t\text{Bu}}(\text{acridine})_2$  complex

| BCP # | Atoms     | Electro density ( $\rho_{\text{BCP}}$ ) in $e \text{ au}^{-3}$ | Laplacian ( $\nabla^2 \rho_{\text{BCP}}$ ) in $e \text{ au}^{-5}$ | Ellipticity ( $\epsilon = \lambda_1/\lambda_2 - 1$ ) | Kinetic energy density ( $K_{\text{BCP}} = -H_{\text{BCP}}$ ) in Hartree | BPL - GBL_I | BCP # | Atoms    | Electro density ( $\rho_{\text{BCP}}$ ) in $e \text{ au}^{-3}$ | Laplacian ( $\nabla^2 \rho_{\text{BCP}}$ ) in $e \text{ au}^{-5}$ | Ellipticity ( $\epsilon = \lambda_1/\lambda_2 - 1$ ) | Kinetic energy density ( $K_{\text{BCP}} = -H_{\text{BCP}}$ ) in Hartree | BPL - GBL_I |
|-------|-----------|----------------------------------------------------------------|-------------------------------------------------------------------|------------------------------------------------------|--------------------------------------------------------------------------|-------------|-------|----------|----------------------------------------------------------------|-------------------------------------------------------------------|------------------------------------------------------|--------------------------------------------------------------------------|-------------|
| 1     | N7 - B16  | 0.155939                                                       | 0.287201                                                          | 0.003474                                             | 0.128096                                                                 | 0.00003     | 1     | N7 - B16 | 0.158407                                                       | 0.292778                                                          | 0.004271                                             | 0.130759                                                                 | 0.000017    |
| 2     | F1 - H22  | 0.014863                                                       | 0.057292                                                          | 0.157325                                             | -0.00091                                                                 | 0.028904    | 2     | F1 - H22 | 0.012399                                                       | 0.050366                                                          | 0.236849                                             | -0.001311                                                                | 0.04094     |
| 3     | C2 - C3   | 0.259199                                                       | -0.631336                                                         | 0.047418                                             | 0.2195                                                                   | 0.000034    | 3     | C6 - N7  | 0.302808                                                       | -0.864488                                                         | 0.162988                                             | 0.454889                                                                 | 0.00017     |
| 4     | C6 - N7   | 0.303532                                                       | -0.872798                                                         | 0.163843                                             | 0.455481                                                                 | 0.000206    | 4     | C2 - C3  | 0.25913                                                        | -0.630925                                                         | 0.048643                                             | 0.21928                                                                  | 0.000038    |
| 5     | C3 - N7   | 0.329283                                                       | -0.824439                                                         | 0.157556                                             | 0.537453                                                                 | 0.000132    | 5     | C3 - N7  | 0.328307                                                       | -0.826906                                                         | 0.156102                                             | 0.534699                                                                 | 0.000123    |
| 6     | C3 - C4   | 0.296454                                                       | -0.754025                                                         | 0.236515                                             | 0.283652                                                                 | 0.000965    | 6     | C3 - C4  | 0.297881                                                       | -0.76116                                                          | 0.239498                                             | 0.286582                                                                 | 0.000958    |
| 7     | C4 - C36  | 0.243373                                                       | -0.548864                                                         | 0.03799                                              | 0.19253                                                                  | 0.000162    | 7     | C4 - C36 | 0.242277                                                       | -0.543969                                                         | 0.03821                                              | 0.190935                                                                 | 0.000301    |
| 8     | C4 - C5   | 0.302336                                                       | -0.762196                                                         | 0.263624                                             | 0.293908                                                                 | 0.001144    | 8     | C4 - C5  | 0.301425                                                       | -0.758199                                                         | 0.259659                                             | 0.292035                                                                 | 0.001121    |
| 9     | C5 - C6   | 0.293986                                                       | -0.747793                                                         | 0.217926                                             | 0.276693                                                                 | 0.000907    | 9     | C5 - C6  | 0.294522                                                       | -0.750751                                                         | 0.21674                                              | 0.277559                                                                 | 0.000871    |
| 10    | C2 - H21  | 0.281818                                                       | -0.984171                                                         | 0.011533                                             | 0.292417                                                                 | 0.000242    | 10    | C2 - H21 | 0.282374                                                       | -0.988605                                                         | 0.011301                                             | 0.293462                                                                 | 0.000231    |
| 11    | C6 - C8   | 0.307326                                                       | -0.828773                                                         | 0.219013                                             | 0.300908                                                                 | 0.000088    | 11    | C6 - C8  | 0.306051                                                       | -0.821262                                                         | 0.219943                                             | 0.298559                                                                 | 0.000114    |
| 12    | N13 - B16 | 0.15652                                                        | 0.282984                                                          | 0.0008                                               |                                                                          |             |       |          |                                                                |                                                                   |                                                      |                                                                          |             |

|    |           |          |           |          |           |          |    |           |          |           |          |           |          |
|----|-----------|----------|-----------|----------|-----------|----------|----|-----------|----------|-----------|----------|-----------|----------|
| 24 | F1 - B16  | 0.160233 | 0.877447  | 0.032861 | 0.086404  | 0.000001 | 24 | F15 - B16 | 0.158402 | 0.862524  | 0.036467 | 0.085358  | 0.000003 |
| 25 | F15 - H23 | 0.014109 | 0.056451  | 0.257158 | -0.001186 | 0.031694 | 25 | C2 - F15  | 0.009483 | 0.045768  | 2.315415 | -0.00206  | 0.199363 |
| 26 | F15 - B16 | 0.161407 | 0.889319  | 0.031951 | 0.086751  | 0.000002 | 26 | F15 - H23 | 0.012842 | 0.055524  | 0.293242 | -0.001719 | 0.06027  |
| 27 | C8 - C17  | 0.25539  | -0.610394 | 0.021349 | 0.213265  | 0.000179 | 27 | F1 - B16  | 0.158798 | 0.864672  | 0.034711 | 0.085616  | 0.000002 |
| 28 | C18 - H27 | 0.283522 | -0.993802 | 0.009351 | 0.295566  | 0.00026  | 28 | H31 - H34 | 0.013515 | 0.059634  | 1.560114 | -0.003301 | 0.936366 |
| 29 | H27 - H51 | 0.013232 | 0.05093   | 0.133182 | -0.002297 | 0.139206 | 29 | C8 - C17  | 0.254987 | -0.608675 | 0.020243 | 0.212547  | 0.000136 |
| 30 | H26 - H32 | 0.012072 | 0.050482  | 1.55591  | -0.002778 | 0.805504 | 30 | C17 - H33 | 0.274027 | -0.934039 | 0.011626 | 0.278228  | 0.000072 |
| 31 | H29 - H42 | 0.015019 | 0.05654   | 0.445887 | -0.002287 | 0.168505 | 31 | C10 - C18 | 0.255612 | -0.608735 | 0.028332 | 0.212049  | 0.000106 |
| 32 | C5 - C19  | 0.253746 | -0.599953 | 0.02828  | 0.209211  | 0.000325 | 32 | C18 - H27 | 0.282611 | -0.987967 | 0.00819  | 0.293792  | 0.00025  |
| 33 | C19 - H29 | 0.283313 | -0.994971 | 0.008919 | 0.295269  | 0.000272 | 33 | H27 - H51 | 0.013169 | 0.052627  | 0.309989 | -0.002562 | 0.256747 |
| 34 | C19 - H34 | 0.013401 | 0.058961  | 1.54509  | -0.003237 | 0.807658 | 34 | C18 - H32 | 0.013478 | 0.057572  | 1.696624 | -0.002834 | 0.146224 |
| 35 | C2 - H20  | 0.27478  | -0.937521 | 0.011691 | 0.279661  | 0.000135 | 35 | H29 - H42 | 0.014302 | 0.055381  | 0.529361 | -0.002449 | 0.198606 |
| 36 | C2 - H22  | 0.282143 | -1.00161  | 0.007924 | 0.293622  | 0.000196 | 36 | C5 - C19  | 0.255446 | -0.608073 | 0.026854 | 0.21209   | 0.000192 |
| 37 | H21 - H48 | 0.011166 | 0.039538  | 0.090195 | -0.001659 | 0.049154 | 37 | C19 - H29 | 0.284462 | -1.005385 | 0.008496 | 0.297443  | 0.000274 |
| 38 | H25 - H54 | 0.011755 | 0.048435  | 1.232112 | -0.002678 | 0.457554 | 38 | C19 - H31 | 0.283312 | -0.994668 | 0.009014 | 0.294774  | 0.000335 |
| 39 | C14 - H23 | 0.285472 | -1.025817 | 0.007212 | 0.299645  | 0.000319 | 39 | C2 - H20  | 0.275682 | -0.944969 | 0.011148 | 0.281309  | 0.000138 |
| 40 | C14 - H24 | 0.274603 | -0.933116 | 0.012744 | 0.279255  | 0.000164 | 40 | C2 - H22  | 0.280747 | -0.988197 | 0.008562 | 0.290755  | 0.000194 |
| 41 | C18 - H26 | 0.274668 | -0.931888 | 0.011215 | 0.279035  | 0.000119 | 41 | H21 - H48 | 0.012655 | 0.043548  | 0.081312 | -0.001548 | 0.042221 |
| 42 | C18 - H28 | 0.278721 | -0.965734 | 0.009026 | 0.286346  | 0.000233 | 42 | C14 - H23 | 0.285999 | -1.029224 | 0.006856 | 0.300558  | 0.00032  |
| 43 | H27 - H58 | 0.013074 | 0.046687  | 0.051321 | -0.001762 | 0.058555 | 43 | C14 - H25 | 0.278266 | -0.95967  | 0.010959 | 0.285923  | 0.000197 |
| 44 | C19 - H30 | 0.273507 | -0.922397 | 0.01319  | 0.276778  | 0.000092 | 44 | C18 - H26 | 0.273831 | -0.925891 | 0.01088  | 0.277413  | 0.000087 |
| 45 | C19 - H31 | 0.281403 | -0.979501 | 0.00921  | 0.29111   | 0.000328 | 45 | C18 - H28 | 0.281056 | -0.980163 | 0.007813 | 0.290588  | 0.000264 |
| 46 | C17 - H34 | 0.284273 | -1.002433 | 0.010229 | 0.296839  | 0.000393 | 46 | H27 - H58 | 0.011953 | 0.042081  | 0.084468 | -0.001628 | 0.046578 |
| 47 | C17 - H32 | 0.283827 | -1.008575 | 0.009114 | 0.296448  | 0.000386 | 47 | C19 - H30 | 0.272622 | -0.913833 | 0.012738 | 0.275195  | 0.000099 |
| 48 | C17 - H33 | 0.274543 | -0.936739 | 0.012071 | 0.279302  | 0.000076 | 48 | C17 - H34 | 0.284705 | -1.008925 | 0.009242 | 0.297864  | 0.000384 |
| 49 | C35 - C49 | 0.239348 | -0.532484 | 0.007531 | 0.187183  | 0.000174 | 49 | C17 - H32 | 0.284787 | -1.008702 | 0.009539 | 0.297974  | 0.000388 |
| 50 | C35 - C53 | 0.2424   | -0.545759 | 0.001146 | 0.191388  | 0.000296 | 50 | C35 - C53 | 0.241954 | -0.54368  | 0.001221 | 0.190807  | 0.0003   |
| 51 | C36 - C41 | 0.241416 | -0.541964 | 0.003393 | 0.189918  | 0.000325 | 51 | C36 - C45 | 0.240172 | -0.535893 | 0.007274 | 0.18843   | 0.000119 |
| 52 | H21 - H38 | 0.012364 | 0.049773  | 0.534996 | -0.002522 | 0.503642 | 52 | C36 - C41 | 0.242103 | -0.544913 | 0.0024   | 0.19091   | 0.000295 |
| 53 | C36 - C37 | 0.238543 | -0.528716 | 0.007161 | 0.186178  | 0.000183 | 53 | H21 - H38 | 0.011318 | 0.045924  | 0.597848 | -0.002419 | 0.863882 |
| 54 | C37 - H38 | 0.281415 | -0.976326 | 0.006719 | 0.291192  | 0.000264 | 54 | C36 - C37 | 0.2385   | -0.528483 | 0.008042 | 0.186132  | 0.000147 |
| 55 | C37 - H39 | 0.276888 | -0.945335 | 0.006826 | 0.282512  | 0.000222 | 55 | C37 - H38 | 0.28075  | -0.971733 | 0.006226 | 0.289884  | 0.000258 |
| 56 | C37 - H40 | 0.276326 | -0.939654 | 0.006173 | 0.281437  | 0.000352 | 56 | C37 - H39 | 0.276541 | -0.940864 | 0.0068   | 0.281761  | 0.000237 |
| 57 | C41 - H42 | 0.279103 | -0.95624  | 0.006308 | 0.286586  | 0.000228 | 57 | C37 - H40 | 0.27629  | -0.939902 | 0.005761 | 0.281386  | 0.00034  |
| 58 | C41 - H44 | 0.277936 | -0.952465 | 0.005446 | 0.284332  | 0.000162 | 58 | C41 - H42 | 0.279445 | -0.960115 | 0.005416 | 0.287126  | 0.000192 |

|    |           |          |           |          |           |          |    |           |          |           |          |           |          |
|----|-----------|----------|-----------|----------|-----------|----------|----|-----------|----------|-----------|----------|-----------|----------|
| 59 | C41 - H43 | 0.277416 | -0.947234 | 0.004697 | 0.283432  | 0.000364 | 59 | C41 - H43 | 0.2772   | -0.945495 | 0.003988 | 0.283052  | 0.000353 |
| 60 | C36 - C45 | 0.240132 | -0.535808 | 0.00727  | 0.188371  | 0.000075 | 60 | C41 - H44 | 0.277908 | -0.950865 | 0.004966 | 0.284269  | 0.000164 |
| 61 | C45 - H46 | 0.276033 | -0.939006 | 0.00478  | 0.280853  | 0.000252 | 61 | C45 - H46 | 0.275951 | -0.937266 | 0.005285 | 0.280807  | 0.000279 |
| 62 | C45 - H47 | 0.276626 | -0.942937 | 0.005085 | 0.282012  | 0.000229 | 62 | C45 - H47 | 0.279473 | -0.962987 | 0.004754 | 0.287267  | 0.000183 |
| 63 | C45 - H48 | 0.278569 | -0.955186 | 0.0054   | 0.285726  | 0.000221 | 63 | C45 - H48 | 0.278513 | -0.953001 | 0.006491 | 0.285767  | 0.000228 |
| 64 | C49 - H50 | 0.276229 | -0.939359 | 0.005865 | 0.28129   | 0.000295 | 64 | C35 - C49 | 0.239894 | -0.534703 | 0.007937 | 0.188019  | 0.000214 |
| 65 | C49 - H51 | 0.28087  | -0.972466 | 0.006276 | 0.29016   | 0.000239 | 65 | C49 - H50 | 0.275547 | -0.930927 | 0.008353 | 0.280172  | 0.00037  |
| 66 | C49 - H52 | 0.276672 | -0.941227 | 0.006302 | 0.282046  | 0.000233 | 66 | C49 - H51 | 0.280692 | -0.968248 | 0.008746 | 0.289994  | 0.000291 |
| 67 | C53 - H54 | 0.277857 | -0.948545 | 0.005455 | 0.284212  | 0.000182 | 67 | H54 - C68 | 0.006283 | 0.017468  | 0.838917 | -0.000858 | 0.610812 |
| 68 | C53 - H55 | 0.279392 | -0.961526 | 0.005034 | 0.287025  | 0.000186 | 68 | C49 - H52 | 0.282002 | -0.986545 | 0.006816 | 0.29209   | 0.000192 |
| 69 | C53 - H56 | 0.277238 | -0.946091 | 0.003409 | 0.283133  | 0.000346 | 69 | C53 - H54 | 0.279641 | -0.964734 | 0.005181 | 0.287362  | 0.000143 |
| 70 | C35 - C57 | 0.238885 | -0.530372 | 0.008744 | 0.186708  | 0.000119 | 70 | C53 - H55 | 0.279421 | -0.958999 | 0.005283 | 0.287237  | 0.000212 |
| 71 | C57 - H58 | 0.279447 | -0.961473 | 0.006468 | 0.287387  | 0.000236 | 71 | C53 - H56 | 0.276854 | -0.941678 | 0.004487 | 0.28253   | 0.000365 |
| 72 | C57 - H59 | 0.276042 | -0.938762 | 0.005535 | 0.28092   | 0.000284 | 72 | C35 - C57 | 0.240076 | -0.535458 | 0.008215 | 0.188404  | 0.000083 |
| 73 | C57 - H60 | 0.27662  | -0.942634 | 0.00598  | 0.281997  | 0.00023  | 73 | C57 - H58 | 0.279098 | -0.957577 | 0.004784 | 0.286708  | 0.000183 |
| 74 | H32 - N61 | 0.007768 | 0.024733  | 0.357182 | -0.000948 | 0.045929 | 74 | C57 - H59 | 0.276061 | -0.9383   | 0.00387  | 0.28102   | 0.000277 |
| 75 | H26 - C62 | 0.003553 | 0.012513  | 0.845676 | -0.000723 | 0.117211 | 75 | C57 - H60 | 0.277163 | -0.944074 | 0.004534 | 0.282977  | 0.000195 |
| 76 | C8 - C65  | 0.006528 | 0.018837  | 1.036884 | -0.000876 | 0.627898 | 76 | H26 - N61 | 0.000744 | 0.003397  | 0.434806 | -0.000249 | 0.088858 |
| 77 | C10 - C81 | 0.005855 | 0.015731  | 0.941454 | -0.000652 | 0.377166 | 77 | C9 - C65  | 0.004452 | 0.013078  | 2.995101 | -0.000612 | 0.04964  |
| 78 | N61 - C62 | 0.343488 | -1.029682 | 0.125107 | 0.562145  | 0.002424 | 78 | H52 - C67 | 0.009    | 0.027823  | 1.50958  | -0.001246 | 0.526439 |
| 79 | N13 - C63 | 0.007615 | 0.022731  | 0.254922 | -0.000713 | 0.013916 | 79 | N61 - C62 | 0.342056 | -1.092131 | 0.114091 | 0.546007  | 0.002352 |
| 80 | F15 - H66 | 0.009387 | 0.042432  | 0.356915 | -0.001783 | 0.106455 | 80 | N13 - C64 | 0.005276 | 0.016447  | 0.419789 | -0.000591 | 0.030862 |
| 81 | C63 - C64 | 0.314263 | -0.866705 | 0.194257 | 0.31624   | 0.000036 | 81 | C62 - C63 | 0.290458 | -0.749721 | 0.14325  | 0.268202  | 0.000143 |
| 82 | N61 - C65 | 0.342047 | -1.029389 | 0.12449  | 0.557888  | 0.00239  | 82 | H25 - H83 | 0.003688 | 0.012561  | 0.352997 | -0.000826 | 0.159539 |
| 83 | C64 - C65 | 0.316516 | -0.87562  | 0.226852 | 0.319847  | 0.000109 | 83 | F15 - H69 | 0.012686 | 0.047662  | 0.053647 | -0.000782 | 0.016217 |
| 84 | C63 - C81 | 0.31502  | -0.869318 | 0.198609 | 0.317785  | 0.000063 | 84 | C63 - C64 | 0.313653 | -0.861764 | 0.180499 | 0.31341   | 0.000042 |
| 85 | C63 - H66 | 0.289565 | -1.075023 | 0.006711 | 0.307129  | 0.000051 | 85 | C6 - C70  | 0.007935 | 0.023862  | 1.611981 | -0.00104  | 0.253242 |
| 86 | H33 - N67 | 0.004813 | 0.016075  | 0.643121 | -0.000779 | 0.063319 | 86 | C64 - C65 | 0.313095 | -0.859382 | 0.178804 | 0.312327  | 0.000016 |
| 87 | H28 - N67 | 0.004501 | 0.014647  | 0.43269  | -0.000684 | 0.033141 | 87 | N61 - C66 | 0.341154 | -1.089148 | 0.11174  | 0.543637  | 0.00236  |
| 88 | C9 - C68  | 0.007664 | 0.022604  | 1.935927 | -0.001026 | 0.236542 | 88 | C65 - C66 | 0.290317 | -0.749378 | 0.141985 | 0.267952  | 0.00015  |
| 89 | C57 - H80 | 0.002998 | 0.009785  | 1.109758 | -0.000591 | 0.453942 | 89 | C62 - C67 | 0.298677 | -0.803161 | 0.165058 | 0.283507  | 0.000071 |
| 90 | N67 - C68 | 0.342555 | -1.020797 | 0.121035 | 0.560434  | 0.002438 | 90 | C63 - C68 | 0.295681 | -0.778293 | 0.142566 | 0.278829  | 0.000083 |
| 91 | F1 - C69  | 0.005935 | 0.028631  | 4.849692 | -0.001638 | 0.34229  | 91 | F15 - H77 | 0.005702 | 0.026595  | 0.107696 | -0.001472 | 0.04132  |
| 92 | F1 - H73  | 0.006551 | 0.032051  | 1.17263  | -0.001814 | 0.378438 | 92 | C64 - H69 | 0.289011 | -1.075537 | 0.008234 | 0.306752  | 0.000046 |
| 93 | C68 - C69 | 0.315861 | -0.873403 | 0.220778 | 0.318404  | 0.000118 | 93 | N7 - H77  | 0.007183 | 0.024871  | 3.164298 | -0.001082 | 0.602109 |

|     |           |          |           |          |           |          |     |            |          |           |          |           |          |
|-----|-----------|----------|-----------|----------|-----------|----------|-----|------------|----------|-----------|----------|-----------|----------|
| 94  | C6 - C71  | 0.006786 | 0.019463  | 1.231208 | -0.000842 | 0.148456 | 94  | H39 - H82  | 0.00508  | 0.017475  | 0.073026 | -0.001056 | 0.015871 |
| 95  | C69 - C70 | 0.315079 | -0.870334 | 0.197482 | 0.317929  | 0.000031 | 95  | C65 - C70  | 0.296245 | -0.780909 | 0.142402 | 0.280027  | 0.000078 |
| 96  | C70 - C71 | 0.314086 | -0.864783 | 0.196939 | 0.315864  | 0.00007  | 96  | C66 - C71  | 0.29925  | -0.805806 | 0.167636 | 0.284677  | 0.000068 |
| 97  | H31 - C72 | 0.004133 | 0.013206  | 0.941904 | -0.00075  | 0.056233 | 97  | C67 - C72  | 0.326824 | -0.918709 | 0.266591 | 0.342853  | 0.000014 |
| 98  | N67 - C72 | 0.342377 | -1.036835 | 0.126618 | 0.558005  | 0.002388 | 98  | C68 - C73  | 0.326953 | -0.918991 | 0.269385 | 0.343093  | 0.000005 |
| 99  | C71 - C72 | 0.315582 | -0.870049 | 0.228488 | 0.318034  | 0.000111 | 99  | C72 - C73  | 0.295795 | -0.780559 | 0.154625 | 0.280181  | 0.000019 |
| 100 | C70 - H73 | 0.288547 | -1.064487 | 0.007143 | 0.304891  | 0.000036 | 100 | H34 - C74  | 0.004704 | 0.014361  | 0.436282 | -0.00078  | 0.109616 |
| 101 | C62 - H74 | 0.28796  | -1.055617 | 0.032358 | 0.302332  | 0.000018 | 101 | C71 - C74  | 0.326319 | -0.916557 | 0.264958 | 0.341803  | 0.00001  |
| 102 | C62 - C81 | 0.315464 | -0.871188 | 0.223109 | 0.317645  | 0.000112 | 102 | C70 - C75  | 0.327569 | -0.92285  | 0.265455 | 0.344266  | 0.000017 |
| 103 | C65 - H75 | 0.287933 | -1.05471  | 0.032797 | 0.302243  | 0.00002  | 103 | C74 - C75  | 0.296359 | -0.783303 | 0.155501 | 0.281309  | 0.000024 |
| 104 | C64 - H76 | 0.286221 | -1.039542 | 0.015076 | 0.300647  | 0.000019 | 104 | C67 - H76  | 0.285855 | -1.038205 | 0.017226 | 0.300173  | 0.000048 |
| 105 | C72 - H77 | 0.287398 | -1.050148 | 0.033906 | 0.301291  | 0.000019 | 105 | C70 - H77  | 0.287368 | -1.048468 | 0.016425 | 0.302733  | 0.000064 |
| 106 | C71 - H78 | 0.28515  | -1.027827 | 0.015622 | 0.298498  | 0.000009 | 106 | C71 - H78  | 0.285511 | -1.034297 | 0.018361 | 0.299533  | 0.000047 |
| 107 | C69 - H79 | 0.287351 | -1.049654 | 0.014366 | 0.302857  | 0.000033 | 107 | C72 - H79  | 0.285341 | -1.029308 | 0.015025 | 0.298642  | 0.000031 |
| 108 | C68 - H80 | 0.289316 | -1.067217 | 0.031319 | 0.30488   | 0.000023 | 108 | C73 - H80  | 0.285114 | -1.026369 | 0.017826 | 0.298355  | 0.000028 |
| 109 | H52 - H82 | 0.004179 | 0.014451  | 0.198821 | -0.000946 | 0.068501 | 109 | C74 - H81  | 0.2847   | -1.022783 | 0.014968 | 0.297354  | 0.000028 |
| 110 | C81 - H82 | 0.28536  | -1.028625 | 0.015232 | 0.298889  | 0.000007 | 110 | C75 - H82  | 0.286488 | -1.035244 | 0.017494 | 0.300833  | 0.000047 |
|     |           |          |           |          |           |          | 111 | C68 - H83  | 0.284241 | -1.019078 | 0.018025 | 0.296585  | 0.000059 |
|     |           |          |           |          |           |          | 112 | H33 - N84  | 0.004889 | 0.015682  | 0.181987 | -0.000706 | 0.024662 |
|     |           |          |           |          |           |          | 113 | H31 - C94  | 0.006021 | 0.019476  | 1.841593 | -0.001058 | 0.396218 |
|     |           |          |           |          |           |          | 114 | H28 - C90  | 0.005481 | 0.016651  | 0.589159 | -0.000885 | 0.121741 |
|     |           |          |           |          |           |          | 115 | N84 - C85  | 0.341205 | -1.084438 | 0.111237 | 0.544787  | 0.002358 |
|     |           |          |           |          |           |          | 116 | C85 - C86  | 0.290419 | -0.749927 | 0.142037 | 0.268177  | 0.000161 |
|     |           |          |           |          |           |          | 117 | F1 - H92   | 0.005319 | 0.025275  | 0.128265 | -0.001478 | 0.078714 |
|     |           |          |           |          |           |          | 118 | C6 - C87   | 0.007024 | 0.021429  | 0.789673 | -0.00094  | 0.025793 |
|     |           |          |           |          |           |          | 119 | C86 - C87  | 0.314007 | -0.863346 | 0.184305 | 0.314211  | 0.000038 |
|     |           |          |           |          |           |          | 120 | C94 - C97  | 0.326846 | -0.919108 | 0.266719 | 0.342916  | 0.000011 |
|     |           |          |           |          |           |          | 121 | C87 - C88  | 0.312943 | -0.858085 | 0.181576 | 0.312011  | 0.000049 |
|     |           |          |           |          |           |          | 122 | N84 - C89  | 0.341298 | -1.09069  | 0.113306 | 0.543773  | 0.002336 |
|     |           |          |           |          |           |          | 123 | C88 - C89  | 0.290622 | -0.750235 | 0.14465  | 0.268556  | 0.000144 |
|     |           |          |           |          |           |          | 124 | C85 - C90  | 0.299374 | -0.806726 | 0.167276 | 0.284971  | 0.000087 |
|     |           |          |           |          |           |          | 125 | F1 - H106  | 0.010856 | 0.044835  | 0.118697 | -0.001344 | 0.037653 |
|     |           |          |           |          |           |          | 126 | N13 - C91  | 0.006905 | 0.020559  | 0.286618 | -0.000622 | 0.008071 |
|     |           |          |           |          |           |          | 127 | C11 - C96  | 0.005452 | 0.015047  | 2.635596 | -0.000618 | 0.163298 |
|     |           |          |           |          |           |          | 128 | H60 - H103 | 0.006481 | 0.02337   | 0.258808 | -0.001407 | 0.083313 |

|     |            |          |           |           |           |          |
|-----|------------|----------|-----------|-----------|-----------|----------|
| 129 | C86 - C91  | 0.295918 | -0.780346 | 0.138985  | 0.279498  | 0.000061 |
| 130 | C87 - H92  | 0.286915 | -1.050742 | 0.008556  | 0.301738  | 0.000029 |
| 131 | H47 - C98  | 0.006564 | 0.022413  | 18.343615 | -0.001203 | 0.368171 |
| 132 | C88 - C93  | 0.296742 | -0.783772 | 0.143264  | 0.280827  | 0.000072 |
| 133 | C89 - C94  | 0.299085 | -0.804824 | 0.167393  | 0.284372  | 0.000066 |
| 134 | H58 - H102 | 0.005659 | 0.020583  | 0.202212  | -0.00132  | 0.194627 |
| 135 | C90 - C95  | 0.327312 | -0.921972 | 0.266451  | 0.343931  | 0.000012 |
| 136 | C91 - C96  | 0.328583 | -0.928663 | 0.266696  | 0.346426  | 0.000025 |
| 137 | C95 - C96  | 0.296452 | -0.785119 | 0.151608  | 0.281417  | 0.000026 |
| 138 | H29 - C97  | 0.004931 | 0.015747  | 1.939951  | -0.000829 | 0.09918  |
| 139 | C93 - C98  | 0.326763 | -0.917855 | 0.268365  | 0.34272   | 0.000004 |
| 140 | C97 - C98  | 0.296011 | -0.781385 | 0.156153  | 0.280654  | 0.000023 |
| 141 | C90 - H99  | 0.285245 | -1.030865 | 0.019622  | 0.299015  | 0.000051 |
| 142 | C93 - H100 | 0.285417 | -1.029034 | 0.016457  | 0.298863  | 0.000056 |
| 143 | C94 - H101 | 0.285574 | -1.034994 | 0.018275  | 0.299647  | 0.000049 |
| 144 | C95 - H102 | 0.285906 | -1.032392 | 0.013614  | 0.299631  | 0.000028 |
| 145 | C96 - H103 | 0.285892 | -1.029722 | 0.01754   | 0.299773  | 0.000041 |
| 146 | C97 - H104 | 0.285123 | -1.02723  | 0.015126  | 0.298237  | 0.000031 |
| 147 | C98 - H105 | 0.284782 | -1.021876 | 0.019076  | 0.297717  | 0.000028 |
| 148 | C91 - H106 | 0.288483 | -1.061782 | 0.015487  | 0.305349  | 0.000098 |

**Table S2.** Summary of topological descriptors at the bond critical points of  $\mathbf{1}_{tBu}$ ·(pyridine)<sub>3</sub> complex based on the QTAIM analyses of the optimised geometries at the B3LYP-D3(BJ)/6-31G(d,p) level of theory.

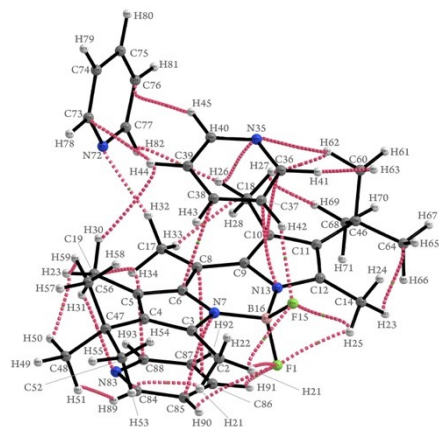

$I_tBu_3(pyridine)_3$  complex

| BCP # | Atoms     | Electro density ( $\rho_{BCP}$ ) in $e au^{-3}$ | Laplacian ( $\nabla^2\rho_{BCP}$ ) in $e au^{-5}$ | Ellipticity ( $\epsilon = \lambda_1/\lambda_2 - 1$ ) | Kinetic energy density ( $K_{BCP} = -H_{BCP}$ ) in Hartree | BPL - GBL_I | BCP # | Atoms     | Electro density ( $\rho_{BCP}$ ) in $e au^{-3}$ | Laplacian ( $\nabla^2\rho_{BCP}$ ) in $e au^{-5}$ | Ellipticity ( $\epsilon = \lambda_1/\lambda_2 - 1$ ) | Kinetic energy density ( $K_{BCP} = -H_{BCP}$ ) in Hartree | BPL - GBL_I |
|-------|-----------|-------------------------------------------------|---------------------------------------------------|------------------------------------------------------|------------------------------------------------------------|-------------|-------|-----------|-------------------------------------------------|---------------------------------------------------|------------------------------------------------------|------------------------------------------------------------|-------------|
| 1     | F1 - H21  | 0.012365                                        | 0.051655                                          | 0.408852                                             | -0.001491                                                  | 0.044694    | 66    | C39 - H44 | 0.285723                                        | -1.03026                                          | 0.016568                                             | 0.29962                                                    | 0.000004    |
| 2     | N7 - B16  | 0.155663                                        | 0.279276                                          | 0.007649                                             | 0.128264                                                   | 0.00001     | 67    | C40 - H45 | 0.289735                                        | -1.070032                                         | 0.032669                                             | 0.305875                                                   | 0.000017    |
| 3     | C6 - N7   | 0.304083                                        | -0.874964                                         | 0.163887                                             | 0.456532                                                   | 0.000199    | 68    | C11 - C46 | 0.243658                                        | -0.550023                                         | 0.038628                                             | 0.192925                                                   | 0.000173    |
| 4     | C2 - H20  | 0.281396                                        | -0.982193                                         | 0.011392                                             | 0.291813                                                   | 0.000262    | 69    | C46 - C68 | 0.239335                                        | -0.53246                                          | 0.007416                                             | 0.187127                                                   | 0.000188    |
| 5     | C2 - C3   | 0.257979                                        | -0.626534                                         | 0.04138                                              | 0.217635                                                   | 0.000035    | 70    | C46 - C64 | 0.242414                                        | -0.545828                                         | 0.001185                                             | 0.1914                                                     | 0.000279    |
| 6     | C3 - C4   | 0.296037                                        | -0.747811                                         | 0.246781                                             | 0.282865                                                   | 0.001085    | 71    | C64 - H67 | 0.277053                                        | -0.944533                                         | 0.003281                                             | 0.28281                                                    | 0.000337    |
| 7     | C6 - C38  | 0.007514                                        | 0.023431                                          | 0.411031                                             | -0.001088                                                  | 0.024281    | 72    | H23 - C64 | 0.011509                                        | 0.050322                                          | 8.606085                                             | -0.002899                                                  | 0.134824    |
| 8     | C4 - C5   | 0.301383                                        | -0.760108                                         | 0.254178                                             | 0.291913                                                   | 0.000947    | 73    | C47 - C52 | 0.242355                                        | -0.545557                                         | 0.001414                                             | 0.19131                                                    | 0.000308    |
| 9     | C3 - N7   | 0.326707                                        | -0.842033                                         | 0.16157                                              | 0.529657                                                   | 0.000109    | 74    | C4 - C47  | 0.243403                                        | -0.548757                                         | 0.039106                                             | 0.192491                                                   | 0.000179    |
| 10    | C6 - C8   | 0.30791                                         | -0.833831                                         | 0.213169                                             | 0.30198                                                    | 0.000143    | 75    | C47 - C48 | 0.239539                                        | -0.53336                                          | 0.007723                                             | 0.18747                                                    | 0.00016     |
| 11    | C5 - C6   | 0.296934                                        | -0.762801                                         | 0.216141                                             | 0.282157                                                   | 0.001064    | 76    | C48 - H49 | 0.27597                                         | -0.937466                                         | 0.006047                                             | 0.280839                                                   | 0.000291    |
| 12    | C8 - C9   | 0.308344                                        | -0.83565                                          | 0.215632                                             | 0.302873                                                   | 0.000119    | 77    | C48 - H50 | 0.280903                                        | -0.973707                                         | 0.006378                                             | 0.290143                                                   | 0.000239    |
| 13    | C9 - N13  | 0.303444                                        | -0.879508                                         | 0.160766                                             | 0.453516                                                   | 0.00028     | 78    | C48 - H51 | 0.276487                                        | -0.9402                                           | 0.006518                                             | 0.281713                                                   | 0.000238    |
| 14    | C9 - C10  | 0.296497                                        | -0.760671                                         | 0.216963                                             | 0.281484                                                   | 0.001052    | 79    | C52 - H53 | 0.27827                                         | -0.951556                                         | 0.005498                                             | 0.284971                                                   | 0.000188    |
| 15    | C10 - C11 | 0.303212                                        | -0.769676                                         | 0.256839                                             | 0.295367                                                   | 0.000957    | 80    | C52 - H55 | 0.27714                                         | -0.945202                                         | 0.003447                                             | 0.28295                                                    | 0.000345    |
| 16    | N13 - B16 | 0.155722                                        | 0.280824                                          | 0.005096                                             | 0.128211                                                   | 0.000109    | 81    | C52 - H54 | 0.278986                                        | -0.958775                                         | 0.005005                                             | 0.286249                                                   | 0.00018     |
| 17    | C11 - C12 | 0.295764                                        | -0.747242                                         | 0.243524                                             | 0.282393                                                   | 0.001095    | 82    | C47 - C56 | 0.238595                                        | -0.529055                                         | 0.008968                                             | 0.18629                                                    | 0.00014     |
| 18    | F1 - H25  | 0.012537                                        | 0.051473                                          | 0.370936                                             | -0.001392                                                  | 0.038434    | 83    | H29 - H59 | 0.01364                                         | 0.048342                                          | 0.044942                                             | -0.001741                                                  | 0.05909     |
| 19    | F1 - B16  | 0.159603                                        | 0.871998                                          | 0.028102                                             | 0.085905                                                   | 0.000001    | 84    | C56 - H57 | 0.276049                                        | -0.938257                                         | 0.005444                                             | 0.280866                                                   | 0.000292    |
| 20    | C12 - N13 | 0.327008                                        | -0.834361                                         | 0.162004                                             | 0.530899                                                   | 0.000129    | 85    | C56 - H58 | 0.276633                                        | -0.942842                                         | 0.005843                                             | 0.282038                                                   | 0.000233    |
| 21    | C12 - C14 | 0.258392                                        | -0.628478                                         | 0.041436                                             | 0.21826                                                    | 0.000031    | 86    | C56 - H59 | 0.279764                                        | -0.963571                                         | 0.006352                                             | 0.28806                                                    | 0.000234    |
| 22    | C14 - H23 | 0.281098                                        | -0.980884                                         | 0.010999                                             | 0.291276                                                   | 0.000251    | 87    | C46 - C60 | 0.238528                                        | -0.528818                                         | 0.009296                                             | 0.186243                                                   | 0.000096    |
| 23    | F15 - B16 | 0.161978                                        | 0.895389                                          | 0.032568                                             | 0.087092                                                   | 0.000002    | 88    | H27 - H62 | 0.012097                                        | 0.043682                                          | 0.072611                                             | -0.001772                                                  | 0.058778    |
| 24    | F15 - H21 | 0.011812                                        | 0.054899                                          | 0.176086                                             | -0.002243                                                  | 0.177723    | 89    | C60 - H61 | 0.275537                                        | -0.934139                                         | 0.00611                                              | 0.280074                                                   | 0.000292    |



|    |           |          |           |          |           |          |     |           |          |           |          |           |          |
|----|-----------|----------|-----------|----------|-----------|----------|-----|-----------|----------|-----------|----------|-----------|----------|
| 25 | F15 - H25 | 0.01107  | 0.052712  | 0.317383 | -0.002339 | 0.234968 | 90  | C60 - H62 | 0.280284 | -0.972053 | 0.007294 | 0.288665  | 0.000255 |
| 26 | C14 - H25 | 0.284779 | -1.019617 | 0.007117 | 0.298198  | 0.00031  | 91  | C60 - H63 | 0.276482 | -0.939323 | 0.006822 | 0.281742  | 0.000251 |
| 27 | C19 - H34 | 0.011787 | 0.050941  | 3.295435 | -0.002809 | 0.172057 | 92  | C64 - H65 | 0.279739 | -0.963554 | 0.004867 | 0.287658  | 0.000198 |
| 28 | C8 - C17  | 0.256596 | -0.616104 | 0.025284 | 0.215534  | 0.000202 | 93  | C64 - H66 | 0.277309 | -0.945403 | 0.005414 | 0.283155  | 0.000164 |
| 29 | C18 - H33 | 0.012422 | 0.052927  | 1.759006 | -0.002719 | 0.149345 | 94  | C68 - H70 | 0.276259 | -0.938678 | 0.005975 | 0.281306  | 0.000321 |
| 30 | C10 - C18 | 0.254722 | -0.604373 | 0.027319 | 0.21067   | 0.000175 | 95  | C68 - H71 | 0.276683 | -0.943136 | 0.006493 | 0.282141  | 0.000221 |
| 31 | H27 - H69 | 0.012904 | 0.051597  | 0.324083 | -0.002549 | 0.281226 | 96  | H32 - N72 | 0.013278 | 0.037562  | 0.075977 | -0.000602 | 0.020999 |
| 32 | C5 - C19  | 0.255137 | -0.605536 | 0.033183 | 0.211568  | 0.000017 | 97  | C74 - C75 | 0.313792 | -0.863335 | 0.197226 | 0.315322  | 0.000055 |
| 33 | H29 - H50 | 0.012669 | 0.049026  | 0.132196 | -0.002293 | 0.141961 | 98  | N72 - C73 | 0.343335 | -1.021477 | 0.120274 | 0.562932  | 0.002378 |
| 34 | H20 - H53 | 0.012477 | 0.050396  | 0.890703 | -0.002629 | 0.341183 | 99  | H44 - C73 | 0.005532 | 0.0191    | 0.485423 | -0.001121 | 0.043431 |
| 35 | C2 - H21  | 0.284932 | -1.020849 | 0.007385 | 0.298562  | 0.000321 | 100 | C73 - C74 | 0.31557  | -0.87164  | 0.222389 | 0.317788  | 0.000111 |
| 36 | C2 - H22  | 0.274436 | -0.932426 | 0.012658 | 0.278967  | 0.000148 | 101 | C76 - C77 | 0.315678 | -0.8726   | 0.221502 | 0.318043  | 0.000116 |
| 37 | C14 - H24 | 0.27424  | -0.93091  | 0.0124   | 0.278576  | 0.000148 | 102 | C75 - C76 | 0.313939 | -0.864083 | 0.19754  | 0.31562   | 0.000057 |
| 38 | C18 - H27 | 0.283031 | -0.992896 | 0.008116 | 0.294594  | 0.00026  | 103 | N72 - C77 | 0.343086 | -1.018905 | 0.118332 | 0.56243   | 0.002413 |
| 39 | C18 - H26 | 0.28111  | -0.980805 | 0.007835 | 0.290544  | 0.000281 | 104 | C73 - H78 | 0.288761 | -1.065627 | 0.032018 | 0.304092  | 0.000018 |
| 40 | C68 - H69 | 0.281081 | -0.973276 | 0.006285 | 0.290603  | 0.000239 | 105 | C74 - H79 | 0.285785 | -1.037819 | 0.014845 | 0.299934  | 0.000001 |
| 41 | C18 - H28 | 0.272963 | -0.91614  | 0.011906 | 0.27584   | 0.000099 | 106 | C75 - H80 | 0.286836 | -1.050309 | 0.007346 | 0.301539  | 0        |
| 42 | C19 - H29 | 0.283003 | -0.988991 | 0.010377 | 0.294634  | 0.000259 | 107 | C76 - H81 | 0.285893 | -1.03893  | 0.01475  | 0.300147  | 0.000002 |
| 43 | C19 - H30 | 0.27904  | -0.966682 | 0.010603 | 0.286859  | 0.000237 | 108 | C77 - H82 | 0.289081 | -1.068117 | 0.031558 | 0.304675  | 0.000017 |
| 44 | C19 - H31 | 0.274569 | -0.935849 | 0.010855 | 0.278906  | 0.00011  | 109 | N83 - C88 | 0.343113 | -1.035696 | 0.126491 | 0.56032   | 0.00241  |
| 45 | C17 - H32 | 0.277011 | -0.964936 | 0.011488 | 0.284606  | 0.000112 | 110 | H34 - C88 | 0.006965 | 0.023751  | 0.567604 | -0.001294 | 0.06101  |
| 46 | H26 - H82 | 0.003602 | 0.012217  | 0.380221 | -0.0008   | 0.327662 | 111 | H31 - N83 | 0.005652 | 0.017595  | 0.088941 | -0.000737 | 0.033727 |
| 47 | C17 - H33 | 0.28321  | -0.992044 | 0.011652 | 0.294814  | 0.000358 | 112 | H51 - H89 | 0.004469 | 0.014991  | 0.137527 | -0.000942 | 0.054239 |
| 48 | C17 - H34 | 0.283076 | -0.996925 | 0.012071 | 0.294988  | 0.000321 | 113 | C84 - H89 | 0.289297 | -1.066747 | 0.031193 | 0.304871  | 0.000025 |
| 49 | N35 - H62 | 0.003582 | 0.012116  | 0.198338 | -0.000616 | 0.037036 | 114 | N83 - C84 | 0.34209  | -1.026048 | 0.118418 | 0.558696  | 0.002424 |
| 50 | C10 - C36 | 0.005789 | 0.017314  | 2.060164 | -0.000764 | 0.114481 | 115 | N7 - C85  | 0.007542 | 0.023464  | 1.756833 | -0.000762 | 0.034715 |
| 51 | H26 - N35 | 0.005159 | 0.017309  | 1.68704  | -0.000833 | 0.105694 | 116 | F1 - H91  | 0.008733 | 0.040589  | 0.478165 | -0.001884 | 0.144228 |
| 52 | H41 - H63 | 0.005365 | 0.018684  | 0.257594 | -0.001139 | 0.092105 | 117 | F1 - H90  | 0.006505 | 0.032227  | 2.551382 | -0.001816 | 0.629287 |
| 53 | N13 - C37 | 0.00653  | 0.01964   | 2.841017 | -0.000662 | 0.095482 | 118 | C84 - C85 | 0.316211 | -0.875102 | 0.221813 | 0.31917   | 0.000117 |
| 54 | N35 - C36 | 0.343034 | -1.02427  | 0.118166 | 0.561553  | 0.002426 | 119 | C85 - C86 | 0.315002 | -0.870326 | 0.195517 | 0.317742  | 0.000024 |
| 55 | F15 - H42 | 0.013362 | 0.04972   | 0.085752 | -0.000754 | 0.019092 | 120 | C86 - C87 | 0.31423  | -0.865246 | 0.197396 | 0.316162  | 0.00007  |
| 56 | C36 - C37 | 0.315657 | -0.872359 | 0.21767  | 0.318071  | 0.000122 | 121 | C8 - C87  | 0.005137 | 0.014692  | 2.02897  | -0.000664 | 1.160864 |
| 57 | H30 - H44 | 0.001938 | 0.006606  | 0.269466 | -0.000419 | 0.276848 | 122 | C87 - C88 | 0.315245 | -0.868436 | 0.227589 | 0.317336  | 0.00011  |
| 58 | C37 - C38 | 0.314541 | -0.867013 | 0.195946 | 0.317085  | 0.000037 | 123 | C88 - H93 | 0.287687 | -1.052965 | 0.032876 | 0.30181   | 0.000017 |
| 59 | C38 - C39 | 0.3142   | -0.864924 | 0.198901 | 0.316138  | 0.00008  | 124 | C85 - H90 | 0.287567 | -1.051373 | 0.014531 | 0.3033    | 0.000034 |

|    |           |          |           |          |           |          |     |           |          |           |          |          |          |
|----|-----------|----------|-----------|----------|-----------|----------|-----|-----------|----------|-----------|----------|----------|----------|
| 60 | H45 - C76 | 0.005692 | 0.018882  | 6.002452 | -0.000929 | 0.46253  | 125 | C86 - H91 | 0.289127 | -1.071579 | 0.007163 | 0.306251 | 0.000045 |
| 61 | N35 - C40 | 0.342445 | -1.036489 | 0.121812 | 0.558288  | 0.002395 | 126 | C87 - H92 | 0.2847   | -1.024293 | 0.016222 | 0.297731 | 0.000006 |
| 62 | C39 - C40 | 0.315143 | -0.867833 | 0.225578 | 0.317096  | 0.000128 |     |           |          |           |          |          |          |
| 63 | C36 - H41 | 0.289498 | -1.067577 | 0.031084 | 0.305251  | 0.000025 |     |           |          |           |          |          |          |
| 64 | C37 - H42 | 0.289468 | -1.074484 | 0.014332 | 0.307863  | 0.000055 |     |           |          |           |          |          |          |
| 65 | C38 - H43 | 0.286843 | -1.047093 | 0.007402 | 0.301253  | 0.000012 |     |           |          |           |          |          |          |

**Table S3.** Summary of topological descriptors at the bond critical points of (**1**<sub>Bu</sub>)<sub>2</sub> based on the QTAIM analysis of the optimised geometries at the B3LYP-D3(BJ)/6-31G(d,p) level of theory.

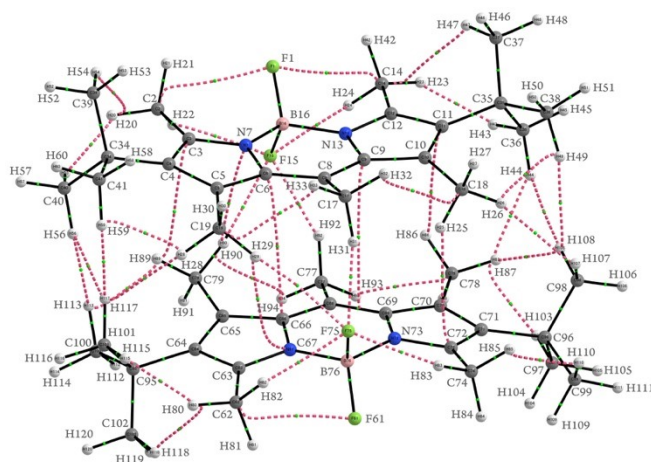

| BCP # | Atoms     | Electro density ( $\rho_{\text{BCP}}$ ) in $\text{e au}^{-3}$ | Laplacian ( $\nabla^2 \rho_{\text{BCP}}$ ) in $\text{e au}^{-5}$ | Ellipticity ( $\epsilon = \lambda_1/\lambda_2 - 1$ ) | Kinetic energy density ( $K_{\text{BCP}} = -H_{\text{BCP}}$ ) in Hartree | BPL - GBL_I | BCP # | Atoms       | Electro density ( $\rho_{\text{BCP}}$ ) in $\text{e au}^{-3}$ | Laplacian ( $\nabla^2 \rho_{\text{BCP}}$ ) in $\text{e au}^{-5}$ | Ellipticity ( $\epsilon = \lambda_1/\lambda_2 - 1$ ) | Kinetic energy density ( $K_{\text{BCP}} = -H_{\text{BCP}}$ ) in Hartree | BPL - GBL_I |
|-------|-----------|---------------------------------------------------------------|------------------------------------------------------------------|------------------------------------------------------|--------------------------------------------------------------------------|-------------|-------|-------------|---------------------------------------------------------------|------------------------------------------------------------------|------------------------------------------------------|--------------------------------------------------------------------------|-------------|
| 1     | F1 - C2   | 0.010026                                                      | 0.047702                                                         | 1.710864                                             | -0.002107                                                                | 0.395258    | 134   | C100 - H113 | 0.280203                                                      | -0.964951                                                        | 0.005602                                             | 0.288654                                                                 | 0.000196    |
| 2     | N7 - B16  | 0.157362                                                      | 0.292206                                                         | 0.002625                                             | 0.129524                                                                 | 0.000016    | 135   | C79 - H89   | 0.281065                                                      | -0.977132                                                        | 0.010774                                             | 0.290881                                                                 | 0.000313    |
| 3     | C2 - C3   | 0.259536                                                      | -0.633299                                                        | 0.049156                                             | 0.220009                                                                 | 0.000045    | 136   | C79 - H90   | 0.284776                                                      | -1.013882                                                        | 0.009715                                             | 0.297572                                                                 | 0.000374    |
| 4     | C3 - C4   | 0.296806                                                      | -0.756415                                                        | 0.236447                                             | 0.28452                                                                  | 0.000959    | 137   | C79 - H91   | 0.273332                                                      | -0.91981                                                         | 0.014483                                             | 0.276623                                                                 | 0.000114    |
| 5     | H20 - H54 | 0.011059                                                      | 0.044803                                                         | 0.521918                                             | -0.002407                                                                | 0.545692    | 138   | C77 - H93   | 0.283176                                                      | -0.993403                                                        | 0.013389                                             | 0.295206                                                                 | 0.000399    |
| 6     | C6 - C66  | 0.004063                                                      | 0.01101                                                          | 2.003623                                             | -0.000493                                                                | 0.029617    | 139   | C77 - H92   | 0.277865                                                      | -0.974441                                                        | 0.011982                                             | 0.28643                                                                  | 0.000121    |
| 7     | C4 - C5   | 0.301545                                                      | -0.7586                                                          | 0.260796                                             | 0.292382                                                                 | 0.001183    | 140   | C77 - H94   | 0.282838                                                      | -0.991845                                                        | 0.013533                                             | 0.294266                                                                 | 0.000378    |
| 8     | C3 - N7   | 0.329838                                                      | -0.819543                                                        | 0.153478                                             | 0.539187                                                                 | 0.000135    | 141   | C95 - C102  | 0.238585                                                      | -0.528869                                                        | 0.007089                                             | 0.186299                                                                 | 0.00016     |
| 9     | C5 - C6   | 0.293972                                                      | -0.748905                                                        | 0.21492                                              | 0.276546                                                                 | 0.000827    | 142   | C64 - C95   | 0.243382                                                      | -0.54875                                                         | 0.037868                                             | 0.192593                                                                 | 0.000326    |
| 10    | C6 - N7   | 0.302188                                                      | -0.873661                                                        | 0.16222                                              | 0.450565                                                                 | 0.00019     | 143   | C100 - H114 | 0.277106                                                      | -0.94445                                                         | 0.004473                                             | 0.282873                                                                 | 0.000358    |
| 11    | C6 - C8   | 0.305781                                                      | -0.819108                                                        | 0.22077                                              | 0.298169                                                                 | 0.000166    | 144   | C98 - H107  | 0.276849                                                      | -0.942757                                                        | 0.004547                                             | 0.282346                                                                 | 0.000188    |
| 12    | N13 - B16 | 0.156548                                                      | 0.289541                                                         | 0.002496                                             | 0.128703                                                                 | 0.000018    | 145   | C96 - C99   | 0.241367                                                      | -0.541308                                                        | 0.002823                                             | 0.189923                                                                 | 0.000282    |
| 13    | C8 - C9   | 0.304978                                                      | -0.815367                                                        | 0.218723                                             | 0.296556                                                                 | 0.000138    | 146   | C71 - C96   | 0.24239                                                       | -0.544347                                                        | 0.036902                                             | 0.191045                                                                 | 0.000226    |

|    |           |          |           |          |           |          |     |             |          |           |          |           |          |
|----|-----------|----------|-----------|----------|-----------|----------|-----|-------------|----------|-----------|----------|-----------|----------|
| 14 | C9 - C10  | 0.29425  | -0.749714 | 0.216511 | 0.277097  | 0.000846 | 147 | C99 - H110  | 0.280048 | -0.964275 | 0.005934 | 0.288401  | 0.000227 |
| 15 | C9 - C69  | 0.003706 | 0.010345  | 3.57772  | -0.000484 | 1.107329 | 148 | C97 - H103  | 0.281146 | -0.973518 | 0.006778 | 0.290685  | 0.000259 |
| 16 | C10 - C11 | 0.301713 | -0.759612 | 0.260656 | 0.292651  | 0.001144 | 149 | H26 - H107  | 0.007145 | 0.025714  | 0.349861 | -0.001459 | 0.149986 |
| 17 | F1 - C14  | 0.009663 | 0.046702  | 2.158521 | -0.002063 | 0.125921 | 150 | C96 - C98   | 0.240668 | -0.53818  | 0.007542 | 0.189227  | 0.000058 |
| 18 | C9 - N13  | 0.3023   | -0.872023 | 0.163182 | 0.451125  | 0.000176 | 151 | C99 - H111  | 0.277229 | -0.945643 | 0.004882 | 0.283121  | 0.00037  |
| 19 | C11 - C12 | 0.297033 | -0.757124 | 0.237652 | 0.284938  | 0.000977 | 152 | H89 - H113  | 0.012881 | 0.050543  | 0.509734 | -0.002471 | 0.181145 |
| 20 | C12 - N13 | 0.328883 | -0.825851 | 0.154484 | 0.536336  | 0.000124 | 153 | H59 - H117  | 0.007845 | 0.027108  | 0.078319 | -0.001349 | 0.012453 |
| 21 | C12 - C14 | 0.259394 | -0.632558 | 0.048376 | 0.219758  | 0.000045 | 154 | H80 - H115  | 0.012641 | 0.043554  | 0.083716 | -0.001549 | 0.042262 |
| 22 | C14 - H47 | 0.011375 | 0.046238  | 0.625244 | -0.002423 | 0.598983 | 155 | C95 - C101  | 0.24083  | -0.539005 | 0.007544 | 0.189402  | 0.000082 |
| 23 | F15 - B16 | 0.15513  | 0.835944  | 0.029985 | 0.083468  | 0.000002 | 156 | C102 - H120 | 0.2761   | -0.938115 | 0.005982 | 0.281014  | 0.000338 |
| 24 | F1 - B16  | 0.166862 | 0.943154  | 0.037969 | 0.089218  | 0.000006 | 157 | C97 - H104  | 0.277252 | -0.948812 | 0.0068   | 0.283188  | 0.000215 |
| 25 | C8 - C17  | 0.253709 | -0.602535 | 0.025121 | 0.211108  | 0.000345 | 158 | C97 - H105  | 0.276417 | -0.939766 | 0.006418 | 0.281586  | 0.000355 |
| 26 | C10 - C18 | 0.254347 | -0.60331  | 0.026428 | 0.210489  | 0.000326 | 159 | C98 - H106  | 0.276122 | -0.939898 | 0.004071 | 0.281091  | 0.000248 |
| 27 | C38 - H50 | 0.278002 | -0.952684 | 0.005406 | 0.284507  | 0.000164 | 160 | C98 - H108  | 0.278432 | -0.951268 | 0.005011 | 0.28538   | 0.00018  |
| 28 | C18 - H32 | 0.012627 | 0.055732  | 2.155495 | -0.003083 | 0.52416  | 161 | C100 - H112 | 0.278179 | -0.953981 | 0.005207 | 0.284879  | 0.000167 |
| 29 | C41 - H58 | 0.278194 | -0.954057 | 0.0052   | 0.284872  | 0.000169 | 162 | C101 - H115 | 0.278553 | -0.953501 | 0.005741 | 0.285805  | 0.000227 |
| 30 | C5 - C19  | 0.253289 | -0.598453 | 0.026336 | 0.208854  | 0.000389 | 163 | C101 - H116 | 0.275995 | -0.938229 | 0.004969 | 0.280845  | 0.000256 |
| 31 | C19 - H33 | 0.012438 | 0.055007  | 1.913896 | -0.003104 | 0.625042 | 164 | C101 - H117 | 0.279129 | -0.956689 | 0.005138 | 0.286711  | 0.000176 |
| 32 | C2 - H20  | 0.282812 | -0.991879 | 0.011062 | 0.294289  | 0.000221 | 165 | C102 - H118 | 0.280536 | -0.969888 | 0.006486 | 0.289468  | 0.000266 |
| 33 | C2 - H21  | 0.276444 | -0.952962 | 0.010409 | 0.282822  | 0.000126 | 166 | C102 - H119 | 0.27726  | -0.948856 | 0.00639  | 0.283172  | 0.000224 |
| 34 | C2 - H22  | 0.27954  | -0.977535 | 0.00883  | 0.288359  | 0.000193 | 134 | C100 - H113 | 0.280203 | -0.964951 | 0.005602 | 0.288654  | 0.000196 |
| 35 | N7 - H90  | 0.005547 | 0.018888  | 0.468316 | -0.000802 | 0.043175 | 135 | C79 - H89   | 0.281065 | -0.977132 | 0.010774 | 0.290881  | 0.000313 |
| 36 | F15 - H22 | 0.010022 | 0.043394  | 0.391984 | -0.0016   | 0.059406 | 136 | C79 - H90   | 0.284776 | -1.013882 | 0.009715 | 0.297572  | 0.000374 |
| 37 | C14 - H23 | 0.281946 | -0.985673 | 0.011034 | 0.2926    | 0.000221 | 137 | C79 - H91   | 0.273332 | -0.91981  | 0.014483 | 0.276623  | 0.000114 |
| 38 | C14 - H42 | 0.276083 | -0.949873 | 0.010351 | 0.282107  | 0.000122 | 138 | C77 - H93   | 0.283176 | -0.993403 | 0.013389 | 0.295206  | 0.000399 |
| 39 | C14 - H24 | 0.28035  | -0.983971 | 0.008512 | 0.289832  | 0.000201 | 139 | C77 - H92   | 0.277865 | -0.974441 | 0.011982 | 0.28643   | 0.000121 |
| 40 | F15 - H24 | 0.010627 | 0.045037  | 0.343136 | -0.001517 | 0.048232 | 140 | C77 - H94   | 0.282838 | -0.991845 | 0.013533 | 0.294266  | 0.000378 |
| 41 | C18 - H25 | 0.28249  | -0.990192 | 0.008955 | 0.29302   | 0.000322 | 141 | C95 - C102  | 0.238585 | -0.528869 | 0.007089 | 0.186299  | 0.00016  |
| 42 | C35 - C38 | 0.241858 | -0.543778 | 0.003158 | 0.190553  | 0.000291 | 142 | C64 - C95   | 0.243382 | -0.54875  | 0.037868 | 0.192593  | 0.000326 |
| 43 | C18 - H26 | 0.284614 | -1.004314 | 0.008555 | 0.297653  | 0.000261 | 143 | C100 - H114 | 0.277106 | -0.94445  | 0.004473 | 0.282873  | 0.000358 |
| 44 | C18 - H27 | 0.273081 | -0.918081 | 0.012997 | 0.276074  | 0.000107 | 144 | C98 - H107  | 0.276849 | -0.942757 | 0.004547 | 0.282346  | 0.000188 |
| 45 | C34 - C41 | 0.242039 | -0.544484 | 0.002859 | 0.190779  | 0.000275 | 145 | C96 - C99   | 0.241367 | -0.541308 | 0.002823 | 0.189923  | 0.000282 |

|    |            |          |           |          |           |          |     |             |          |           |          |           |          |
|----|------------|----------|-----------|----------|-----------|----------|-----|-------------|----------|-----------|----------|-----------|----------|
| 46 | C19 - H28  | 0.282246 | -0.986527 | 0.009632 | 0.293122  | 0.000284 | 146 | C71 - C96   | 0.24239  | -0.544347 | 0.036902 | 0.191045  | 0.000226 |
| 47 | C19 - H29  | 0.282782 | -0.994859 | 0.009397 | 0.293454  | 0.000338 | 147 | C99 - H110  | 0.280048 | -0.964275 | 0.005934 | 0.288401  | 0.000227 |
| 48 | C19 - H30  | 0.273377 | -0.92063  | 0.013585 | 0.276617  | 0.000103 | 148 | C97 - H103  | 0.281146 | -0.973518 | 0.006778 | 0.290685  | 0.000259 |
| 49 | C17 - H31  | 0.278542 | -0.982286 | 0.011908 | 0.287949  | 0.000106 | 149 | H26 - H107  | 0.007145 | 0.025714  | 0.349861 | -0.001459 | 0.149986 |
| 50 | C17 - H32  | 0.282296 | -0.987036 | 0.014112 | 0.29336   | 0.000402 | 150 | C96 - C98   | 0.240668 | -0.53818  | 0.007542 | 0.189227  | 0.000058 |
| 51 | C17 - H33  | 0.282506 | -0.98867  | 0.01424  | 0.293642  | 0.000396 | 151 | C99 - H111  | 0.277229 | -0.945643 | 0.004882 | 0.283121  | 0.00037  |
| 52 | C34 - C39  | 0.238316 | -0.527649 | 0.007484 | 0.18595   | 0.000151 | 152 | H89 - H113  | 0.012881 | 0.050543  | 0.509734 | -0.002471 | 0.181145 |
| 53 | C4 - C34   | 0.242777 | -0.54591  | 0.038713 | 0.191738  | 0.000398 | 153 | H59 - H117  | 0.007845 | 0.027108  | 0.078319 | -0.001349 | 0.012453 |
| 54 | C41 - H60  | 0.277137 | -0.944919 | 0.004455 | 0.282954  | 0.000351 | 154 | H80 - H115  | 0.012641 | 0.043554  | 0.083716 | -0.001549 | 0.042262 |
| 55 | C11 - C35  | 0.242262 | -0.543746 | 0.038184 | 0.191004  | 0.000382 | 155 | C95 - C101  | 0.24083  | -0.539005 | 0.007544 | 0.189402  | 0.000082 |
| 56 | C35 - C37  | 0.238341 | -0.527784 | 0.007831 | 0.185958  | 0.000167 | 156 | C102 - H120 | 0.2761   | -0.938115 | 0.005982 | 0.281014  | 0.000338 |
| 57 | C37 - H47  | 0.280806 | -0.971793 | 0.006607 | 0.289974  | 0.000264 | 157 | C97 - H104  | 0.277252 | -0.948812 | 0.0068   | 0.283188  | 0.000215 |
| 58 | C38 - H51  | 0.277118 | -0.944508 | 0.004693 | 0.28291   | 0.00036  | 158 | C97 - H105  | 0.276417 | -0.939766 | 0.006418 | 0.281586  | 0.000355 |
| 59 | C35 - C36  | 0.240669 | -0.538143 | 0.007163 | 0.189071  | 0.000081 | 159 | C98 - H106  | 0.276122 | -0.939898 | 0.004071 | 0.281091  | 0.000248 |
| 60 | H23 - H43  | 0.011742 | 0.040787  | 0.087477 | -0.001579 | 0.042353 | 160 | C98 - H108  | 0.278432 | -0.951268 | 0.005011 | 0.28538   | 0.00018  |
| 61 | C37 - H48  | 0.27623  | -0.938831 | 0.006098 | 0.281239  | 0.000361 | 161 | C100 - H112 | 0.278179 | -0.953981 | 0.005207 | 0.284879  | 0.000167 |
| 62 | H26 - H49  | 0.013763 | 0.053486  | 0.492152 | -0.002425 | 0.172729 | 162 | C101 - H115 | 0.278553 | -0.953501 | 0.005741 | 0.285805  | 0.000227 |
| 63 | C39 - H52  | 0.27612  | -0.93824  | 0.005963 | 0.281025  | 0.000345 | 163 | C101 - H116 | 0.275995 | -0.938229 | 0.004969 | 0.280845  | 0.000256 |
| 64 | H20 - H55  | 0.012986 | 0.044375  | 0.081236 | -0.001506 | 0.040478 | 164 | C101 - H117 | 0.279129 | -0.956689 | 0.005138 | 0.286711  | 0.000176 |
| 65 | C34 - C40  | 0.240403 | -0.536992 | 0.007385 | 0.188688  | 0.000082 | 165 | C102 - H118 | 0.280536 | -0.969888 | 0.006486 | 0.289468  | 0.000266 |
| 66 | H28 - H59  | 0.012666 | 0.049821  | 0.540963 | -0.002446 | 0.185598 | 166 | C102 - H119 | 0.27726  | -0.948856 | 0.00639  | 0.283172  | 0.000224 |
| 67 | C11 - H86  | 0.004881 | 0.014531  | 0.651585 | -0.000746 | 0.037593 | 134 | C100 - H113 | 0.280203 | -0.964951 | 0.005602 | 0.288654  | 0.000196 |
| 68 | C36 - H43  | 0.278457 | -0.953739 | 0.005673 | 0.285614  | 0.000213 | 135 | C79 - H89   | 0.281065 | -0.977132 | 0.010774 | 0.290881  | 0.000313 |
| 69 | H49 - H108 | 0.005744 | 0.020136  | 0.471807 | -0.001197 | 0.112763 | 136 | C79 - H90   | 0.284776 | -1.013882 | 0.009715 | 0.297572  | 0.000374 |
| 70 | C36 - H44  | 0.278179 | -0.950915 | 0.005067 | 0.284903  | 0.000208 | 137 | C79 - H91   | 0.273332 | -0.91981  | 0.014483 | 0.276623  | 0.000114 |
| 71 | C36 - H45  | 0.276139 | -0.93928  | 0.004666 | 0.281106  | 0.000262 | 138 | C77 - H93   | 0.283176 | -0.993403 | 0.013389 | 0.295206  | 0.000399 |
| 72 | C37 - H46  | 0.27726  | -0.948869 | 0.006767 | 0.283169  | 0.000222 | 139 | C77 - H92   | 0.277865 | -0.974441 | 0.011982 | 0.28643   | 0.000121 |
| 73 | C38 - H49  | 0.280239 | -0.964866 | 0.005854 | 0.288642  | 0.000212 | 140 | C77 - H94   | 0.282838 | -0.991845 | 0.013533 | 0.294266  | 0.000378 |
| 74 | C39 - H53  | 0.277304 | -0.949223 | 0.006477 | 0.283247  | 0.000225 | 141 | C95 - C102  | 0.238585 | -0.528869 | 0.007089 | 0.186299  | 0.00016  |
| 75 | C39 - H54  | 0.280411 | -0.969082 | 0.006495 | 0.289207  | 0.000266 | 142 | C64 - C95   | 0.243382 | -0.54875  | 0.037868 | 0.192593  | 0.000326 |
| 76 | C40 - H55  | 0.278716 | -0.954609 | 0.006077 | 0.286123  | 0.000235 | 143 | C100 - H114 | 0.277106 | -0.94445  | 0.004473 | 0.282873  | 0.000358 |
| 77 | C40 - H56  | 0.278853 | -0.955899 | 0.005617 | 0.286196  | 0.000208 | 144 | C98 - H107  | 0.276849 | -0.942757 | 0.004547 | 0.282346  | 0.000188 |

|     |            |          |           |          |           |          |     |             |          |           |          |           |          |
|-----|------------|----------|-----------|----------|-----------|----------|-----|-------------|----------|-----------|----------|-----------|----------|
| 78  | C40 - H57  | 0.276009 | -0.938285 | 0.005417 | 0.280939  | 0.000262 | 145 | C96 - C99   | 0.241367 | -0.541308 | 0.002823 | 0.189923  | 0.000282 |
| 79  | C41 - H59  | 0.279893 | -0.962383 | 0.005781 | 0.288126  | 0.000202 | 146 | C71 - C96   | 0.24239  | -0.544347 | 0.036902 | 0.191045  | 0.000226 |
| 80  | F75 - B76  | 0.154812 | 0.833199  | 0.028819 | 0.083244  | 0.000003 | 147 | C99 - H110  | 0.280048 | -0.964275 | 0.005934 | 0.288401  | 0.000227 |
| 81  | H29 - N67  | 0.004424 | 0.015187  | 2.414624 | -0.000752 | 0.381765 | 148 | C97 - H103  | 0.281146 | -0.973518 | 0.006778 | 0.290685  | 0.000259 |
| 82  | F61 - C62  | 0.009851 | 0.047092  | 1.90911  | -0.002095 | 0.30437  | 149 | H26 - H107  | 0.007145 | 0.025714  | 0.349861 | -0.001459 | 0.149986 |
| 83  | N67 - B76  | 0.157291 | 0.294936  | 0.00216  | 0.129262  | 0.000027 | 150 | C96 - C98   | 0.240668 | -0.53818  | 0.007542 | 0.189227  | 0.000058 |
| 84  | C62 - C63  | 0.259622 | -0.633859 | 0.048619 | 0.22022   | 0.000043 | 151 | C99 - H111  | 0.277229 | -0.945643 | 0.004882 | 0.283121  | 0.00037  |
| 85  | H28 - H117 | 0.005779 | 0.020693  | 0.40147  | -0.001219 | 0.054968 | 152 | H89 - H113  | 0.012881 | 0.050543  | 0.509734 | -0.002471 | 0.181145 |
| 86  | C63 - C64  | 0.296695 | -0.756761 | 0.233386 | 0.284373  | 0.000967 | 153 | H59 - H117  | 0.007845 | 0.027108  | 0.078319 | -0.001349 | 0.012453 |
| 87  | C3 - H89   | 0.004327 | 0.013605  | 2.37207  | -0.000718 | 0.349932 | 154 | H80 - H115  | 0.012641 | 0.043554  | 0.083716 | -0.001549 | 0.042262 |
| 88  | H56 - H113 | 0.007031 | 0.024124  | 0.122316 | -0.001279 | 0.012642 | 155 | C95 - C101  | 0.24083  | -0.539005 | 0.007544 | 0.189402  | 0.000082 |
| 89  | H80 - H118 | 0.011342 | 0.045826  | 0.489633 | -0.002437 | 0.470295 | 156 | C102 - H120 | 0.2761   | -0.938115 | 0.005982 | 0.281014  | 0.000338 |
| 90  | C64 - C65  | 0.302864 | -0.765316 | 0.262057 | 0.294813  | 0.001106 | 157 | C97 - H104  | 0.277252 | -0.948812 | 0.0068   | 0.283188  | 0.000215 |
| 91  | C63 - N67  | 0.33064  | -0.820056 | 0.151489 | 0.541274  | 0.000139 | 158 | C97 - H105  | 0.276417 | -0.939766 | 0.006418 | 0.281586  | 0.000355 |
| 92  | C65 - C66  | 0.292641 | -0.743016 | 0.210514 | 0.27415   | 0.000861 | 159 | C98 - H106  | 0.276122 | -0.939898 | 0.004071 | 0.281091  | 0.000248 |
| 93  | H29 - F75  | 0.003922 | 0.017952  | 1.090551 | -0.001175 | 0.016093 | 160 | C98 - H108  | 0.278432 | -0.951268 | 0.005011 | 0.28538   | 0.00018  |
| 94  | C66 - N67  | 0.301765 | -0.874917 | 0.159642 | 0.449068  | 0.000186 | 161 | C100 - H112 | 0.278179 | -0.953981 | 0.005207 | 0.284879  | 0.000167 |
| 95  | F15 - H92  | 0.014736 | 0.050592  | 0.050783 | -0.000189 | 0.004    | 162 | C101 - H115 | 0.278553 | -0.953501 | 0.005741 | 0.285805  | 0.000227 |
| 96  | C66 - C68  | 0.306858 | -0.823627 | 0.22536  | 0.300307  | 0.000178 | 163 | C101 - H116 | 0.275995 | -0.938229 | 0.004969 | 0.280845  | 0.000256 |
| 97  | N73 - B76  | 0.156149 | 0.284637  | 0.005897 | 0.12849   | 0.000082 | 164 | C101 - H117 | 0.279129 | -0.956689 | 0.005138 | 0.286711  | 0.000176 |
| 98  | C68 - C69  | 0.303547 | -0.809097 | 0.214572 | 0.293747  | 0.000131 | 165 | C102 - H118 | 0.280536 | -0.969888 | 0.006486 | 0.289468  | 0.000266 |
| 99  | H87 - H108 | 0.011087 | 0.039546  | 0.140386 | -0.001638 | 0.042019 | 166 | C102 - H119 | 0.27726  | -0.948856 | 0.00639  | 0.283172  | 0.000224 |
| 100 | C69 - C70  | 0.295414 | -0.75414  | 0.219422 | 0.279371  | 0.001058 | 134 | C100 - H113 | 0.280203 | -0.964951 | 0.005602 | 0.288654  | 0.000196 |
| 101 | C72 - N73  | 0.326431 | -0.838728 | 0.157608 | 0.529124  | 0.000135 | 135 | C79 - H89   | 0.281065 | -0.977132 | 0.010774 | 0.290881  | 0.000313 |
| 102 | C96 - C97  | 0.238948 | -0.530652 | 0.007845 | 0.186649  | 0.000204 | 136 | C79 - H90   | 0.284776 | -1.013882 | 0.009715 | 0.297572  | 0.000374 |
| 103 | C70 - C71  | 0.302226 | -0.764647 | 0.25705  | 0.293476  | 0.000957 | 137 | C79 - H91   | 0.273332 | -0.91981  | 0.014483 | 0.276623  | 0.000114 |
| 104 | H25 - C72  | 0.005061 | 0.01795   | 3.00889  | -0.000916 | 0.067845 | 138 | C77 - H93   | 0.283176 | -0.993403 | 0.013389 | 0.295206  | 0.000399 |
| 105 | C69 - N73  | 0.302529 | -0.878139 | 0.165031 | 0.450212  | 0.000184 | 139 | C77 - H92   | 0.277865 | -0.974441 | 0.011982 | 0.28643   | 0.000121 |
| 106 | C71 - C72  | 0.297955 | -0.758351 | 0.246735 | 0.286448  | 0.001113 | 140 | C77 - H94   | 0.282838 | -0.991845 | 0.013533 | 0.294266  | 0.000378 |
| 107 | C99 - H109 | 0.277946 | -0.952461 | 0.005881 | 0.284379  | 0.000169 | 141 | C95 - C102  | 0.238585 | -0.528869 | 0.007089 | 0.186299  | 0.00016  |
| 108 | C72 - C74  | 0.258452 | -0.628851 | 0.040808 | 0.218417  | 0.00011  | 142 | C64 - C95   | 0.243382 | -0.54875  | 0.037868 | 0.192593  | 0.000326 |
| 109 | H31 - F75  | 0.017449 | 0.05522   | 0.026882 | 0.000529  | 0.001507 | 143 | C100 - H114 | 0.277106 | -0.94445  | 0.004473 | 0.282873  | 0.000358 |

|     |            |          |           |          |           |          |     |             |          |           |          |           |          |
|-----|------------|----------|-----------|----------|-----------|----------|-----|-------------|----------|-----------|----------|-----------|----------|
| 110 | F75 - H83  | 0.013767 | 0.054205  | 0.254946 | -0.001082 | 0.026392 | 144 | C98 - H107  | 0.276849 | -0.942757 | 0.004547 | 0.282346  | 0.000188 |
| 111 | F75 - H82  | 0.01076  | 0.045669  | 0.326387 | -0.001527 | 0.052995 | 145 | C96 - C99   | 0.241367 | -0.541308 | 0.002823 | 0.189923  | 0.000282 |
| 112 | F61 - B76  | 0.167412 | 0.946989  | 0.037333 | 0.089681  | 0.000006 | 146 | C71 - C96   | 0.24239  | -0.544347 | 0.036902 | 0.191045  | 0.000226 |
| 113 | C68 - C77  | 0.25452  | -0.606447 | 0.024763 | 0.212231  | 0.00019  | 147 | C99 - H110  | 0.280048 | -0.964275 | 0.005934 | 0.288401  | 0.000227 |
| 114 | H44 - H87  | 0.008134 | 0.028327  | 0.150687 | -0.001412 | 0.02672  | 148 | C97 - H103  | 0.281146 | -0.973518 | 0.006778 | 0.290685  | 0.000259 |
| 115 | C70 - C78  | 0.255141 | -0.606103 | 0.02953  | 0.211267  | 0.000214 | 149 | H26 - H107  | 0.007145 | 0.025714  | 0.349861 | -0.001459 | 0.149986 |
| 116 | H87 - H103 | 0.012815 | 0.05189   | 0.40759  | -0.002607 | 0.346695 | 150 | C96 - C98   | 0.240668 | -0.53818  | 0.007542 | 0.189227  | 0.000058 |
| 117 | C78 - H93  | 0.013528 | 0.055822  | 1.499668 | -0.002626 | 0.177808 | 151 | C99 - H111  | 0.277229 | -0.945643 | 0.004882 | 0.283121  | 0.00037  |
| 118 | F15 - H90  | 0.008614 | 0.033677  | 0.074253 | -0.00107  | 0.001151 | 152 | H89 - H113  | 0.012881 | 0.050543  | 0.509734 | -0.002471 | 0.181145 |
| 119 | C65 - C79  | 0.253385 | -0.599085 | 0.025014 | 0.209247  | 0.00042  | 153 | H59 - H117  | 0.007845 | 0.027108  | 0.078319 | -0.001349 | 0.012453 |
| 120 | H90 - H94  | 0.012773 | 0.05639   | 1.357411 | -0.003219 | 0.833733 | 154 | H80 - H115  | 0.012641 | 0.043554  | 0.083716 | -0.001549 | 0.042262 |
| 121 | C62 - H80  | 0.282798 | -0.991708 | 0.01114  | 0.294261  | 0.000226 | 155 | C95 - C101  | 0.24083  | -0.539005 | 0.007544 | 0.189402  | 0.000082 |
| 122 | C62 - H81  | 0.276289 | -0.95192  | 0.010563 | 0.282569  | 0.000125 | 156 | C102 - H120 | 0.2761   | -0.938115 | 0.005982 | 0.281014  | 0.000338 |
| 123 | C62 - H82  | 0.279861 | -0.980673 | 0.008799 | 0.289038  | 0.000194 | 157 | C97 - H104  | 0.277252 | -0.948812 | 0.0068   | 0.283188  | 0.000215 |
| 124 | C74 - H84  | 0.275862 | -0.945487 | 0.011591 | 0.281547  | 0.000142 | 158 | C97 - H105  | 0.276417 | -0.939766 | 0.006418 | 0.281586  | 0.000355 |
| 125 | C74 - H83  | 0.284542 | -1.017868 | 0.007028 | 0.297764  | 0.000295 | 159 | C98 - H106  | 0.276122 | -0.939898 | 0.004071 | 0.281091  | 0.000248 |
| 126 | H85 - H110 | 0.012706 | 0.049854  | 0.516964 | -0.002486 | 0.19228  | 160 | C98 - H108  | 0.278432 | -0.951268 | 0.005011 | 0.28538   | 0.00018  |
| 127 | C74 - H85  | 0.279291 | -0.965246 | 0.011473 | 0.287782  | 0.000253 | 161 | C100 - H112 | 0.278179 | -0.953981 | 0.005207 | 0.284879  | 0.000167 |
| 128 | H44 - H108 | 0.005908 | 0.020031  | 0.366665 | -0.001126 | 0.004408 | 162 | C101 - H115 | 0.278553 | -0.953501 | 0.005741 | 0.285805  | 0.000227 |
| 129 | C78 - H86  | 0.280522 | -0.978054 | 0.008063 | 0.28938   | 0.000229 | 163 | C101 - H116 | 0.275995 | -0.938229 | 0.004969 | 0.280845  | 0.000256 |
| 130 | C78 - H87  | 0.282861 | -0.987602 | 0.008646 | 0.294181  | 0.000225 | 164 | C101 - H117 | 0.279129 | -0.956689 | 0.005138 | 0.286711  | 0.000176 |
| 131 | C78 - H88  | 0.273635 | -0.922401 | 0.011325 | 0.277088  | 0.000112 | 165 | C102 - H118 | 0.280536 | -0.969888 | 0.006486 | 0.289468  | 0.000266 |
| 132 | H56 - H117 | 0.009823 | 0.032895  | 0.100884 | -0.001351 | 0.012525 | 166 | C102 - H119 | 0.27726  | -0.948856 | 0.00639  | 0.283172  | 0.000224 |
| 133 | C95 - C100 | 0.242088 | -0.544792 | 0.002619 | 0.190869  | 0.000272 | 134 | C100 - H113 | 0.280203 | -0.964951 | 0.005602 | 0.288654  | 0.000196 |
